RESEARCH ARTICLE

# Diet and stable isotope analyses reveal the feeding ecology of the orangeback squid *Sthenoteuthis pteropus* (Steenstrup 1855) (Mollusca, Ommastrephidae) in the eastern tropical Atlantic

Véronique Merten<sup>1\*</sup>, Bernd Christiansen<sup>2</sup>, Jamileh Javidpour<sup>1</sup>, Uwe Piatkowski<sup>1</sup>, Oscar Puebla<sup>1,3</sup>, Rebeca Gasca<sup>4</sup>, Henk-Jan T. Hoving<sup>1</sup>

**1** GEOMAR Helmholtz Centre for Ocean Research Kiel, Kiel, Germany, **2** Universität Hamburg, Institute for Hydrobiology and Fishery Sciences, Hamburg, Germany, **3** Christian-Albrechts-Universität zu Kiel, Kiel, Germany, **4** El Colegio de la Frontera Sur, Chetumal, Mexico

\* [vmerten@geomar.de](mailto:vmerten@geomar.de)

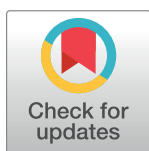

**OPEN ACCESS**

**Citation:** Merten V, Christiansen B, Javidpour J, Piatkowski U, Puebla O, Gasca R, et al. (2017) Diet and stable isotope analyses reveal the feeding ecology of the orangeback squid *Sthenoteuthis pteropus* (Steenstrup 1855) (Mollusca, Ommastrephidae) in the eastern tropical Atlantic. PLoS ONE 12(12): e0189691. <https://doi.org/10.1371/journal.pone.0189691>

**Editor:** Erik V. Thuesen, Evergreen State College, UNITED STATES

**Received:** April 15, 2017

**Accepted:** November 30, 2017

**Published:** December 15, 2017

**Copyright:** © 2017 Merten et al. This is an open access article distributed under the terms of the [Creative Commons Attribution License](https://creativecommons.org/licenses/by/4.0/), which permits unrestricted use, distribution, and reproduction in any medium, provided the original author and source are credited.

**Data Availability Statement:** All data is available from the PANGAEA database (<https://doi.pangaea.de/10.1594/PANGAEA.874974>).

**Funding:** Henk-Jan T. Hoving and Uwe Piatkowski obtained the funding for this study from the DFG-supported Cluster of Excellence 80 “The Future Ocean” (grant CP1218), <http://www.futureocean.org/en/index.php>. Shiptime and associated

## Abstract

In the eastern tropical Atlantic, the orangeback flying squid *Sthenoteuthis pteropus* (Steenstrup 1855) (Cephalopoda, Ommastrephidae) is a dominant species of the epipelagic nekton community. This carnivore squid has a short lifespan and is one of the fastest-growing squids. In this study, we characterise the role of *S. pteropus* in the pelagic food web of the eastern tropical Atlantic by investigating its diet and the dynamics of its feeding habits throughout its ontogeny and migration. During three expeditions in the eastern tropical Atlantic in 2015, 129 specimens were caught by hand jigging. Stomach content analyses (via visual identification and DNA barcoding) were combined with stable isotope data ( $\delta^{15}\text{N}$  and  $\delta^{13}\text{C}$ ) of muscle tissue to describe diet, feeding habits and trophic ecology of *S. pteropus*. Additionally, stable isotope analyses of incremental samples along the squid’s gladius—the chitinous spiniform structure supporting the muscles and organs—were carried out to explore possible diet shifts through ontogeny and migration. Our results show that *S. pteropus* preys mainly on myctophid fishes (e.g. *Myctophum asperum*, *Myctophum nitidulum*, *Vinciguerria* spp.), but also on other teleost species, cephalopods (e.g. Enoploteuthidae, Bolitiniidae, Ommastrephidae), crustaceans and possibly on gelatinous zooplankton as well. The squid shows a highly opportunistic feeding behaviour that includes cannibalism. Our study indicates that the trophic position of *S. pteropus* may increase by approximately one trophic level from a mantle length of 15 cm to 47 cm. The reconstructed isotope-based feeding chronologies of the gladii revealed high intra- and inter-individual variability in the squid’s trophic position and foraging area. These findings are not revealed by diet or muscle tissue stable isotope analysis. This suggests a variable and complex life history involving individual variation and migration. The role of *S. pteropus* in transferring energy and nutrients from lower to higher trophic levels may be underestimated and important for understanding how a changing ocean impacts food webs in the eastern Atlantic.

financial support were provided by the DFG (grant MSM49 to Bernd Christiansen).

**Competing interests:** The authors have declared that no competing interests exist.

## Introduction

Oceanic squids are muscular, fast moving opportunistic molluscan predators that feed on a variety of prey [1–3] to sustain high metabolic and growth rates [1,4–6]. Squids generally have a short lifespan of about 1–2 years and are semelparous; there is one reproductive cycle after which the individual dies [4]. They play a key role in the trophic structure of marine pelagic ecosystems [7,8] due to their large and in some areas increasing biomass [9] and their importance in the diet of marine predators such as fishes and marine mammals [10,11]. There is growing evidence that cephalopod populations may benefit from changing ocean environments and overexploitation of finfish species [9,12,13]. The capacity of oceanic squids (e.g. Humboldt squid) to take over niches of overexploited fish stocks and to flexibly adjust their distribution, life history and physiology may make them potential winners in a future ocean [14–16]. The impacts of squid population expansions on marine food webs are challenging to predict; thus, their ecological role needs to be better understood. In the eastern tropical Atlantic, the orangeback flying squid *Sthenoteuthis pteropus* (Ommastrephidae) is one of the dominant members of the epipelagic nekton community [17]. It is among the fastest growing squids and undertakes diel vertical migrations [18]. The species feeds in surface waters at night and migrates to deeper layers (down to 1200 m) during the day [19]. Information on their feeding ecology, including ontogenetic changes in diet and cannibalistic behaviours are limited [5,17–19]. The prey spectrum of *S. pteropus* switches during their ontogeny from crustaceans in early juveniles (3–9 cm mantle length (ML)) to micronektonic fishes in late juveniles and middle-sized individuals (9–35 cm ML) and finally to nektonic fishes and squids in adult large-sized squid (35–65 cm ML) [17,18]. This pattern is consistent with feeding in other ommastrephid squids [20–23]. Furthermore, *S. pteropus* is an important prey for top predators such as swordfish, marine mammals and sharks [17]. This influence of *S. pteropus* on high and low trophic levels in the ecosystem and its high abundance and reproduction rate suggests that they have a relevant role in the pelagic food web [17]. Stomach content analysis of hard parts that are resistant to digestion (e.g. squid beaks, fish otoliths and crustacean exoskeletons) allowed prey identification at different taxonomic levels [24]. Yet a limitation of the visual inspection of squid stomach contents is that prey items are often macerated beyond recognition or eroded due to digestion [1,25]. DNA sequencing of stomach contents can provide additional insights in prey species composition [26,27]. Since squids are known to reject hard parts, such as fish heads, stomach content analysis alone may bias when investigating prey species composition and prey size [1]. Additionally, the stomach contents represent only the last feeding event and do therefore not provide sufficient information about the squid's average trophic position. The analysis of stable isotope ( $\delta^{15}\text{N}$ ,  $\delta^{13}\text{C}$ ) ratios from body tissues has been used for studying the trophic role of squids and can provide time-integrated information about the trophic position of the recently assimilated (< 2 months) diet [28]. Tissue of consumers is enriched in  $^{15}\text{N}$  relative to their food, and therefore  $\delta^{15}\text{N}$  values are indicators of a consumer's trophic position [29]. In the marine environment, there is little variation in stable isotope ratios of carbon along the food chain, but carbon reflects spatial variations of the environment and can indicate inshore versus offshore, pelagic versus benthic feeding or latitudinal variations in foraging habitat [29]. Therefore,  $\delta^{13}\text{C}$  may provide information about the animal's foraging area, habitat and migration patterns. In order to obtain high resolution data on feeding ecology and individual migration behaviour, we analyzed stable isotope ratios of the cephalopod gladius. This archival hard structure, which consists of chitin and proteins, is present in the hatchlings and grows continuously with no metabolic turnover after synthesis. Using a combination of visual and molecular stomach content and stable isotope analysis we investigated the diet and the position of *S. pteropus* in the pelagic food web of the eastern

tropical Atlantic and discussed size-based changes, individual variability of feeding habits, foraging habitats and migration.

### Materials and methods

Permission for sampling invertebrates in Cape Verdean waters was not required. A bilateral agreement between the Republic of Cape Verde and the Federal Republic of Germany grants German research vessels to conduct scientific research in Cape Verdean waters. The field studies did not involve sampling in protected areas or of endangered or protected species. Orange-back flying squid ( $n = 129$ ) were caught in surface waters at night by hand jigging (jig size between 5–10 cm) with a light source for attraction. They were captured in the Cape Verde area of the eastern tropical Atlantic between 17°N– 2°N and 26°W– 21°W in May–June 2015 from the R/V Meteor (cruise M116), in September–October 2015 from the R/V Meteor (cruise M119) and in November–December 2015 from the R/V Maria S. Merian (cruise MSM49) (Fig 1). The squid were killed immediately after capture by decapitation [30]. Dorsal mantle length (ML) of all specimens were measured to the nearest millimeter and body mass was measured by a kitchen scale at calm sea or in the lab after defrosting. Sex and maturity stage were determined following Lipiński & Underhill [31]. A qualitative, visual stomach fullness index (SFI) was assigned: 0 = empty; 1 = traces of food; 2 = less than half full; 3 = more than half full; 4 = full; 5 = crammed with walls distended [32]. The stomachs of all individuals were stored in 70% ethanol or frozen (-40°C); samples of mantle muscle tissue and gladii from individuals of the cruise MSM49 were stored in -80°C and -40°C, respectively, for later stable isotope analysis.

### Stomach content analysis

Stomachs were defrosted, opened and contents screened through a 300 µm mesh sieve in order to sort prey items. A binocular stereomicroscope was used to identify prey items to the

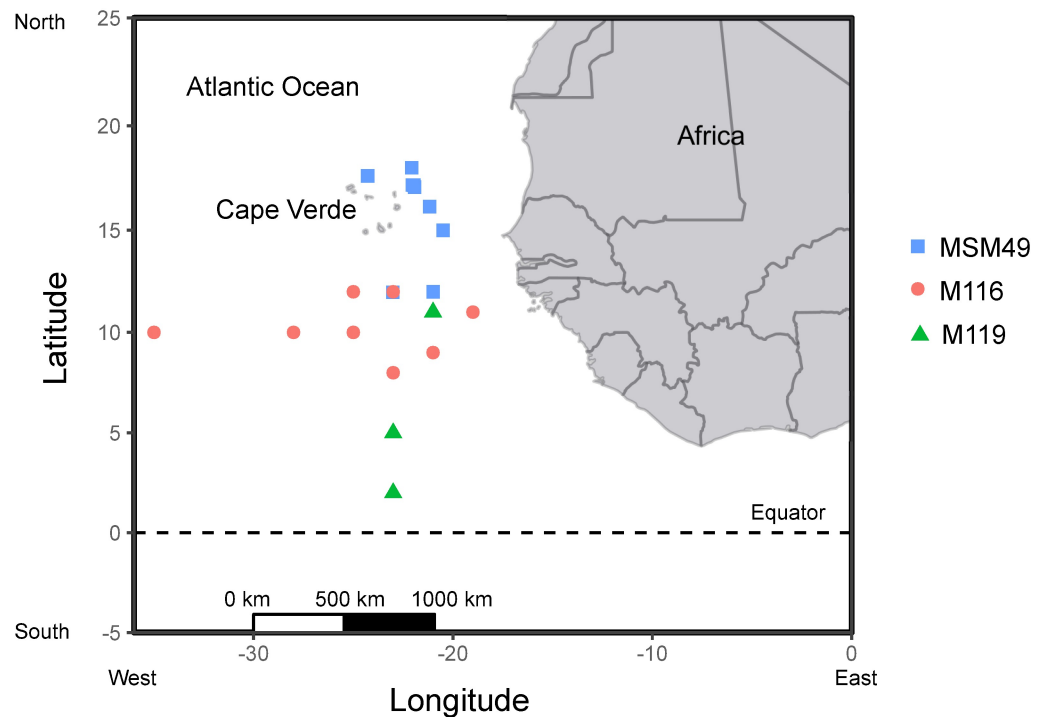

**Fig 1. Capture locations of all *Sthenoteuthis pteropus* samples in the tropical eastern Atlantic in 2015 from three research cruises (MSM49, M116, M119).**

<https://doi.org/10.1371/journal.pone.0189691.g001>

lowest possible taxon. Fish sagittal otoliths were identified following specialized regional literature [10,33–37]. Cephalopod beaks were identified according to Clarke [38], the Tree of Life Web Project [39] and a reference collection obtained during cruise WH383 around Cape Verde. Crustaceans were identified by their exoskeletons [40] and with the aid of the keys and illustrations posted at the Marine Species Identification Portal [41]. Frequency of occurrence and number were used to quantify occurrence of prey taxa in the stomachs [2,42]. The number of individual fishes or cephalopods that were found in one stomach were estimated by the maximum number of right or left otoliths and of upper or lower beaks. Frequency of occurrence (FO%) was calculated as the percentage of *S. pteropus* that fed on a certain prey and the relative number (N%) is the number of individuals of a certain prey, relative to the total number of individual prey.

### Stable isotope analysis

Stable isotope analysis was conducted only on the squid specimens caught in December 2015 (MSM49). Gladii were taken from the five largest individuals (five females > 40.0 cm ML, one male of 20 cm ML); muscle tissue was taken from 54 specimens (18.4–47.5 cm ML, females = 44; males = 10). Only the proostracum (including rachis and vanes) was used for stable isotope analysis (Fig 2), because its growth increments are clearly distinguishable and represent the entire lifespan of the squid [43–45]. Samples taken from the anterior part of the proostracum represent the most recently deposited organic material, while samples taken at the distal end correspond to the juvenile life phase.

Gladii were cleaned with distilled water, dried with KimWipes (Kimberly-Clark), measured to the nearest millimeter and the proostracum was cut in 10–20 mm increments following the V shape of the growth lines (Fig 2). The gladius samples ( $n_{\text{subsamples}} = 135$ ) were freeze-dried for 24h and ground into a fine powder with mortar and pestle. The samples were freeze-dried again for 4h and weighed with a microbalance and 80–120  $\mu\text{g}$  of the powder were transferred into tin containers for isotopic analysis. To estimate the current trophic position of the squid in the food web, stable isotopes ( $\delta^{13}\text{C}$ ;  $\delta^{15}\text{N}$ ) were analyzed in muscle mantle tissue of 54 specimens including those that were used for gladii analysis. Muscle tissue samples were treated as the gladii. They were also freeze-dried for 24h and ground to a fine powder. However, lipids from muscle tissue samples were extracted using chloroform and the remaining tissue was dried over night at 50°C. Lipids were not extracted from the gladii samples because chitinous structures like beaks and gladii do not contain significant amounts of lipids that could bias  $^{13}\text{C}$  values [24]. The suggestion of Post et al. [47] was followed to conduct lipid corrections on  $\delta^{13}\text{C}$  values if C/N ratios are higher than 3.5. This was the case for gladii  $\delta^{13}\text{C}$  values. This method led to a small increase (1‰ in average) in  $\delta^{13}\text{C}$ , but with a similar pattern over time (S1 Fig). Isotope ratios of C and N were measured using an elemental analyzer system (NA 1110, Thermo, Milan, Italy) connected to a temperature-controlled gas chromatography oven (SRI 9300, SRI Instruments, Torrance, CA, USA), which contained a column for permanent gases. Separated sample gases and the reference gases  $\text{N}_2$  and  $\text{CO}_2$  were transferred via a ConFloIII interface (Thermo Fisher Scientific, Bremen, Germany) to the isotope ratio mass spectrometer (Delta<sup>Plus</sup> Advantage, Thermo Fisher Scientific). Measured isotope ratios are given as  $\delta$  values in per mil deviation (‰) from the standard reference material Vienna PeeDee Belemnite (VPDB) and atmospheric nitrogen following the equation  $\delta X = [(R_{\text{Sample}}/R_{\text{Standard}}) - 1] \times 1000$  where X refers to  $^{13}\text{C}$  or  $^{15}\text{N}$  and R represents the ratio of the heavy isotope to the light isotope ( $^{13}\text{C}/^{12}\text{C}$  or  $^{15}\text{N}/^{14}\text{N}$ ). Laboratory gas cylinders of  $\text{CO}_2$  and  $\text{N}_2$  were used as working standards and calibrated against primary solid standards (IAEA-N1, -N2, -N3, USGS24, NBS22). The lab standard acetanilide used to estimate C and N content for each sample series

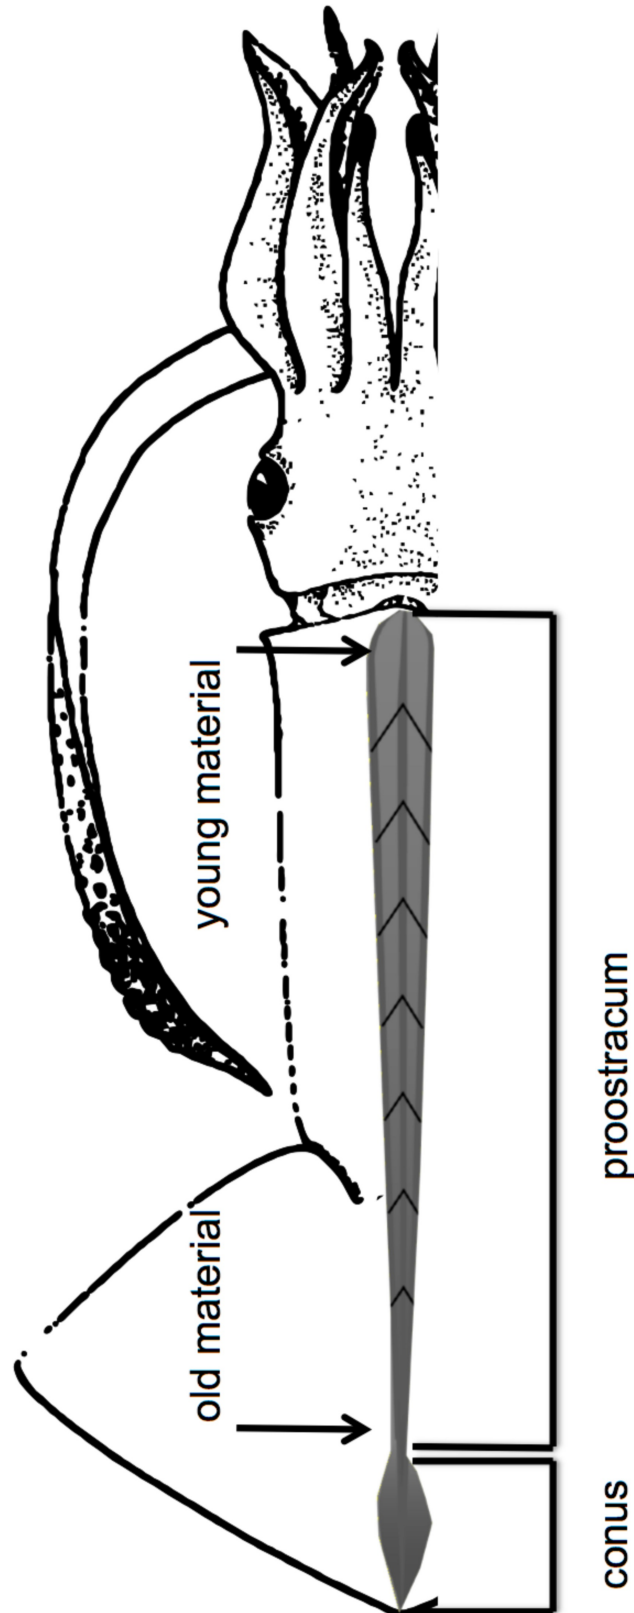

**Fig 2. Gladius of a squid separated into a conus and proostracum (including rachis and vanes) section.** (after Roper et al. [46] and Lorrain et al. [45]).

<https://doi.org/10.1371/journal.pone.0189691.g002>

was measured every seventh sample with a standard deviation of  $\pm 0.16\%$  for  $\delta^{15}\text{N}$  and  $\pm 0.39\%$  for  $\delta^{13}\text{C}$ .

## DNA barcoding

To complement visual stomach content analysis, a total of 27 unidentifiable tissue prey items from 23 *Sthenoteuthis pteropus* individuals (19.5–47.5 cm ML) and five crustaceans from the stomachs of 5 individuals were sequenced at mitochondrial cytochrome c oxidase subunit 1 (mCOI). The barcoded prey items represent a subset of all unidentifiable prey items of the stomachs. This approach provided expanded data of the squid's prey spectrum and a way to detect cannibalism, because squids tend to tear their prey apart beyond recognition and spit out hard parts such as beaks which are difficult to swallow. Prey items were preserved in 70% ethanol after screening the stomach contents of *S. pteropus*. DNA was extracted with QIAGEN DNeasy Blood & Tissue columns following the manufacturer's protocol. The COI barcode was amplified by a polymerase chain reaction (PCR) in 10  $\mu\text{L}$  reactions containing 3  $\mu\text{L}$  DNA, 1  $\mu\text{L}$  primer LCO1490 (F) and HCO21988 (R) for invertebrate samples [48] as well as VF2\_t1 (F) and FR1d\_t1 (R) for fishes [49] at 10  $\mu\text{M}$  concentration each, 0.1  $\mu\text{L}$  Promega taq DNA Polymerase at 5U/ $\mu\text{L}$  concentration, 1  $\mu\text{L}$  10x PCR buffer, 1  $\mu\text{L}$  dNTPs at 2mM concentration each and 4.9  $\mu\text{L}$  sigma water. The PCR thermal cycle consisted of one initial denaturation step of 6 min at 96°C, 30 cycles of 20 s at 94°C, 30 s at 55°C and 40 s at 72°C, and one final extension step of 20 min at 72°C. PCR products were purified with ExoSAP-IT (Affymetrix USB) using 2  $\mu\text{L}$  of cleanup reagent, incubated for 15 min at 37°C and inactivated for 15 min at 80°C. Sequencing reactions were performed in 10  $\mu\text{L}$  volume containing 2  $\mu\text{L}$  of purified PCR product, 1  $\mu\text{L}$  primer at 10  $\mu\text{M}$  concentration, 1  $\mu\text{L}$  BigDye Terminator v3.1 (Applied Biosystems), 3  $\mu\text{L}$  BigDye buffer and 3  $\mu\text{L}$  sigma water. The PCR thermal cycle consisted of one initial denaturation step of 1 min at 96°C followed by 30 cycles of 10 s at 96°C, 5 s at 50°C and 4 min at 60°C. Sequencing reactions were run on an ABI PRISM 3130xl automated genetic analyzer (Applied Biosystems). Sequence trace files were exported into Codon Code Alligner (Codon Code Corporation) and the forward and reverse sequences were trimmed and assembled. Assembled contigs were examined and edited by hand. Consensus sequences were compared to public databases using the Basic Local Alignment Search Tool (BLAST) on the NCBI server (<http://www.ncbi.nlm.nih.gov/blast>) and to reference cephalopod material obtained during the WH383 research cruise that took place in the same area.

## Data analysis

Data exploration to test for significant relationships and collinearity of explanatory variables of all regression analyses were conducted following the methods of Zuur et al. [50]. Regression analysis was used to determine whether stable isotope signatures of the muscle tissue changed with size. The largest individual (C) was treated as an outlier and excluded from the analysis, because it showed low  $\delta^{15}\text{N}$  values throughout its entire life cycle, differing strikingly from the other individuals. A generalized additive model (GAM, R packages: nlme and mgcv [51,52]) was used to evaluate the relationship between  $\delta^{15}\text{N}$  gladii stable isotope values as a function of gladii length. Since  $\delta^{15}\text{N}$  gladii stable isotope values were not normally distributed, box-cox power transformation ( $\lambda = 1.8$ ) was applied to the data using the MASS package in R [53].  $\delta^{13}\text{C}$  data of gladii were corrected based on Post et al. [47]. Due to high level of residuals' heterogeneity a generalized least squares (GLS) model with a fixed variance structure (Var-Fixed) was applied to test the  $\delta^{13}\text{C}$  as a function of gladii length. To investigate the diet in relation to size, collected squid were divided into four size classes according to their mantle length. Squid ranging between 13.0 and 20.4 cm ML were defined as small, 20.5–30.4 cm as medium,

30.5–40.4 cm as large and 40.5–50.4 cm as very large. All statistics were performed with the freeware R (Version 3.3.2).

## Results

### Population structure

During the three research cruises a total of 129 specimens were captured with ML ranging between 13.1 and 47.5 cm; including 97 females (75%), 31 males (24%) and one unsexed individual (1%) (Table 1). Female mantle lengths ranged from 20.2 to 32.4 cm and body mass (BM) from 55 to 1,449 g and the male ML ranged from 17.5 to 21.7 cm and the BM from 151 to 327 g. Most females were immature (77%), followed by 13% mature and 6% maturing individuals. Male squid were mostly mature (75%), followed by 16% maturing and 9% immature individuals. The sample sizes were 22, 50 and 57 for cruises M119, M116 and MSM49, respectively.

### General diet analysis

Few stomachs were crammed with food (3%). Most stomachs were either full (29%), half full (27%) or less than half full (23%). Traces of food were observed in 10% of all squid stomachs and 8% were empty (S2 Fig). Stomach contents showed three main groups of prey: fishes, cephalopods and crustaceans (Table 2). A total of 336 fish otoliths and 52 cephalopod beaks were found. Over 80% of cephalopod and crustacean occurrences were single and no more than three individuals per stomach occurred. 50% of fish occurrences were single or double

**Table 1. Population structure of *Sthenoteuthis pteropus* (n = 129) in the eastern tropical Atlantic in 2015 caught during three research cruises (latitude and longitude are rounded).**

| Cruise | Latitude (°N) | Longitude (°W) | Date         | Sex       |           |          | Total      | ML (cm)          |
|--------|---------------|----------------|--------------|-----------|-----------|----------|------------|------------------|
|        |               |                |              | Female    | Male      | Juvenile |            |                  |
| MSM49  | 17.4          | 24.1           | December     | 6         | 0         | 0        | 6          | 21.5–30.5        |
|        | 18.1          | 21.6           | December     | 3         | 1         | 0        | 4          | 21.0–45.5        |
|        | 17.1          | 22.0           | December     | 4         | 6         | 0        | 10         | 18.4–34.6        |
|        | 17.1          | 21.6           | December     | 2         | 2         | 0        | 4          | 19.7–41.0        |
|        | 17.1          | 21.5           | December     | 3         | 0         | 0        | 3          | 21.5–47.5        |
|        | 16.1          | 21.2           | December     | 13        | 1         | 0        | 14         | 18.8–43.4        |
|        | 14.6          | 20.3           | December     | 3         | 0         | 0        | 3          | 26.3–36.8        |
|        | 12.0          | 20.6           | December     | 7         | 1         | 0        | 8          | 18.9–32.0        |
|        | 11.6          | 23.0           | December     | 4         | 1         | 0        | 5          | 18.7–30.8        |
| M116   | 8.0           | 23.0           | May/June     | 4         | 2         | 0        | 6          | 15.2–27.2        |
|        | 9.0           | 21.0–40.0      | May/June     | 2         | 0         | 0        | 2          | 21.1–27.9        |
|        | 10.0          | 28.0           | May/June     | 3         | 1         | 0        | 4          | 17.9–33.5        |
|        | 10.0          | 25.0           | May/June     | 5         | 4         | 0        | 9          | 15.6–39.0        |
|        | 10.0          | 35.0           | May/June     | 1         | 1         | 0        | 2          | 17.1–25.3        |
|        | 11.0          | 19.0           | May/June     | 5         | 0         | 0        | 5          | 20.4–25.7        |
|        | 12.0          | 23.0           | May/June     | 5         | 4         | 1        | 10         | 15.5–33.1        |
|        | 12.0          | 22.0           | May/June     | 5         | 1         | 0        | 6          | 18.0–27.1        |
| M119   | 11.0          | 21.0           | Sept./Oct.   | 3         | 1         | 0        | 4          | 19.5–25.0        |
|        | 2.0           | 23.0           | Sept./Oct.   | 14        | 4         | 0        | 18         | 13.1–31.0        |
|        |               |                | <b>Total</b> | <b>97</b> | <b>31</b> | <b>1</b> | <b>129</b> | <b>13.1–47.5</b> |

<https://doi.org/10.1371/journal.pone.0189691.t001>

**Table 2. Summary of prey composition found in the stomach contents of *Sthenoteuthis pteropus* from the eastern tropical Atlantic in 2015 by frequency of occurrence (FO), frequency of occurrence in percent (%FO), number (N) and number in percent (%N).**

| Prey                              | FO        | %FO         | N          | %N          |
|-----------------------------------|-----------|-------------|------------|-------------|
| <b>Pisces</b>                     | <b>88</b> | <b>67.7</b> | <b>336</b> | <b>82.8</b> |
| <u>Myctophidae</u>                | 76        | 58.5        | 208        | 51.2        |
| <i>Bolinichthys</i> sp.           | 5         | 3.8         | 6          | 1.5         |
| <i>Ceratoscopelus warmingii</i>   | 10        | 7.7         | 12         | 3.0         |
| <i>Diogenichthys atlanticus</i>   | 1         | 0.8         | 1          | 0.2         |
| <i>Diaphus</i> sp.                | 1         | 0.8         | 1          | 0.2         |
| <i>Diaphus dumerilii</i>          | 5         | 3.8         | 12         | 3.0         |
| <i>Diaphus fragilis</i>           | 2         | 1.5         | 2          | 0.5         |
| <i>Diaphus lucidus</i>            | 1         | 0.8         | 1          | 0.2         |
| <i>Diaphus vanhoeffeni</i>        | 9         | 6.9         | 9          | 2.2         |
| <i>Gonichthys</i> sp.             | 4         | 3.1         | 4          | 1.0         |
| <i>Hygophum</i> sp.               | 7         | 5.4         | 9          | 2.2         |
| <i>Hygophum hygomii</i>           | 12        | 9.2         | 13         | 3.2         |
| <i>Hygophum macrochir</i>         | 7         | 5.4         | 9          | 2.2         |
| <i>Hygophum taaningi</i>          | 11        | 8.5         | 21         | 5.2         |
| <i>Hygophum proximum</i>          | 3         | 2.3         | 4          | 1.0         |
| <i>Hygophum reinhardtii</i>       | 3         | 2.3         | 9          | 2.2         |
| <i>Lampanyctus</i> sp.            | 3         | 2.3         | 4          | 1.0         |
| <i>Lampanyctus intricarius</i>    | 1         | 0.8         | 1          | 0.2         |
| <i>Lampanyctus festivus</i>       | 1         | 0.8         | 1          | 0.2         |
| <i>Lampanyctus nobilis</i>        | 2         | 1.5         | 2          | 0.5         |
| <i>Lepidophanes gaussi?</i>       | 1         | 0.8         | 1          | 0.2         |
| <i>Lepidophanes guentheri</i>     | 1         | 0.8         | 1          | 0.2         |
| <i>Myctophum</i> sp.              | 10        | 7.7         | 16         | 3.9         |
| <i>Myctophum asperum</i>          | 18        | 13.8        | 26         | 6.4         |
| <i>Myctophum nitidulum</i>        | 15        | 11.5        | 21         | 5.2         |
| <i>Myctophum obtusirostre</i>     | 1         | 0.8         | 1          | 0.2         |
| <i>Myctophum selenops</i>         | 4         | 3.1         | 4          | 1.0         |
| <i>Myctophum spinosum</i>         | 4         | 3.1         | 4          | 1.0         |
| <i>Notoscopelus caudispinosus</i> | 1         | 0.8         | 3          | 0.7         |
| <i>Symbolophorus</i> sp.          | 4         | 3.1         | 5          | 1.2         |
| <i>Symbolophorus rufinus</i>      | 4         | 3.1         | 5          | 1.2         |
| Unidentified Myctophidae          | 18        | 13.8        | 22         | 5.4         |
| Other Pisces                      |           |             |            |             |
| <u>Bathylagidae</u>               | 3         | 2.3         | 4          | 1.0         |
| <u>Bregmacerotidae</u>            | 4         | 3.1         | 5          | 1.2         |
| <i>Bregmacerotidae</i> sp.        | 1         | 0.8         | 1          | 0.2         |
| <i>Merluccius</i> sp.             | 3         | 2.3         | 4          | 1.0         |
| <u>Exocoetidae</u>                | 4         | 3.1         | 6          | 1.5         |
| <i>Exocoetus</i> sp.              | 3         | 2.3         | 3          | 0.7         |
| <i>Exocoetus obtusirostris</i>    | 2         | 1.5         | 3          | 0.7         |
| <u>Nomeidae</u>                   | 1         | 0.8         | 2          | 0.5         |
| <i>Cubiceps pauciradiatus</i>     | 1         | 0.8         | 2          | 0.5         |
| <u>Paralepididae</u>              | 2         | 1.5         | 4          | 1.0         |
| <i>Paralepididae</i> sp.          | 1         | 0.8         | 1          | 0.2         |

(Continued)



**Table 2.** (Continued)

| Prey                                        | FO         | %FO         | N          | %N          |
|---------------------------------------------|------------|-------------|------------|-------------|
| <b>Pisces</b>                               | <b>88</b>  | <b>67.7</b> | <b>336</b> | <b>82.8</b> |
| <i>Lestidiops sphyrenoides</i>              | 2          | 1.5         | 2          | 0.5         |
| <i>Lestrolepis intermedia</i>               | 1          | 0.8         | 1          | 0.2         |
| Phosichthyidae                              | 9          | 6.9         | 41         | 10.1        |
| <i>Vinciguerria attenuata</i>               | 4          | 3.1         | 21         | 5.2         |
| <i>Vinciguerria nimbaria</i>                | 8          | 6.2         | 20         | 4.9         |
| Stomiidae                                   | 1          | 0.8         | 2          | 0.5         |
| <i>Chauliodus sloani</i>                    | 1          | 0.8         | 2          | 0.5         |
| Unidentified Otoliths                       | 41         | 31.5        | 64         | 15.8        |
| <b>Cephalopoda</b>                          | <b>37</b>  | <b>28.5</b> | <b>52</b>  | <b>12.8</b> |
| Bolitaenidae                                | 2          | 1.5         | 2          | 0.5         |
| Enoploteuthidae                             | 8          | 6.2         | 9          | 2.2         |
| Histioteuthidae                             | 1          | 0.8         | 1          | 0.2         |
| Mastigoteuthidae                            | 1          | 0.8         | 1          | 0.2         |
| Octopoda (cirrata)                          | 2          | 1.5         | 2          | 0.5         |
| Ommastrephidae                              | 2          | 1.5         | 2          | 0.5         |
| Onychoteuthidae                             | 1          | 0.8         | 1          | 0.2         |
| Pyroteuthidae                               | 1          | 0.8         | 1          | 0.2         |
| Unidentified Beak (destroyed or upper beak) | 25         | 19.2        | 33         | 8.1         |
| <b>Crustacea</b>                            | <b>17</b>  | <b>13.1</b> | <b>18</b>  | <b>4.4</b>  |
| Decapoda                                    | 14         | 10.8        | 15         | 3.7         |
| Euphausiacea                                | 3          | 2.3         | 3          | 0.7         |
| <b>Total</b>                                | <b>142</b> |             | <b>406</b> |             |

<https://doi.org/10.1371/journal.pone.0189691.t002>

and more than five individuals per stomach were rare. A stomach contained on average 3 prey species  $\pm$  1.9 with 9 prey species being the maximum found in one stomach.

About 68% of the stomachs examined contained fish, accounting for 83% by prey number. The most abundant prey family in terms of both occurrence and numbers were Myctophidae (58.5% FO and 51.2% N) (Fig 3A) and this was independent of the squid size (Fig 4). Seven of the eight largest individuals (> 35 cm, included in the size classes large and very large) had only myctophids in their stomachs and one stomach contained flying fish (Exocoetidae). Because the sample size for the largest size group is low (n = 4), the diet results of very large sized squid have to be interpreted with caution. While 30 different myctophid species were identified in total, *Myctophum asperum* and *Myctophum nitidulum* most frequently occurred in the stomachs (13.8% FO and 11.5% FO, respectively) (Fig 3B). Fish otoliths that could not be identified accounted for 15.8% N, thus representing an occurrence of 31.5% FO. Fishes of the genus *Vinciguerria* (Phosichthyidae) occurred in 6.9% of all stomachs and accounted for 10.1% of all fish prey. They were usually not abundant in the diet of small and middle-sized squid, occurring in only 6–15% of stomachs and not consumed by large-sized squid (Fig 4). However, in 9 stomachs, they were present in high numbers (n = 41). Other fish families found as squid prey were Bathylagidae, Bregmacerotidae, Paralepididae, Stomiidae and Nomeidae (Fig 3A). The maximum number of individual fishes counted in one stomach was 22 and these were the species *V. attenuata* and *V. nimbaria* (in a female squid, ML 23.5 cm).

Cephalopods were the second most important prey group of *S. pteropus*, occurring in 29% of all stomachs and accounting for 13% of all prey by number (Table 2). Since the beaks were mainly very small and eroded by digestion, they could only be identified to family level. In

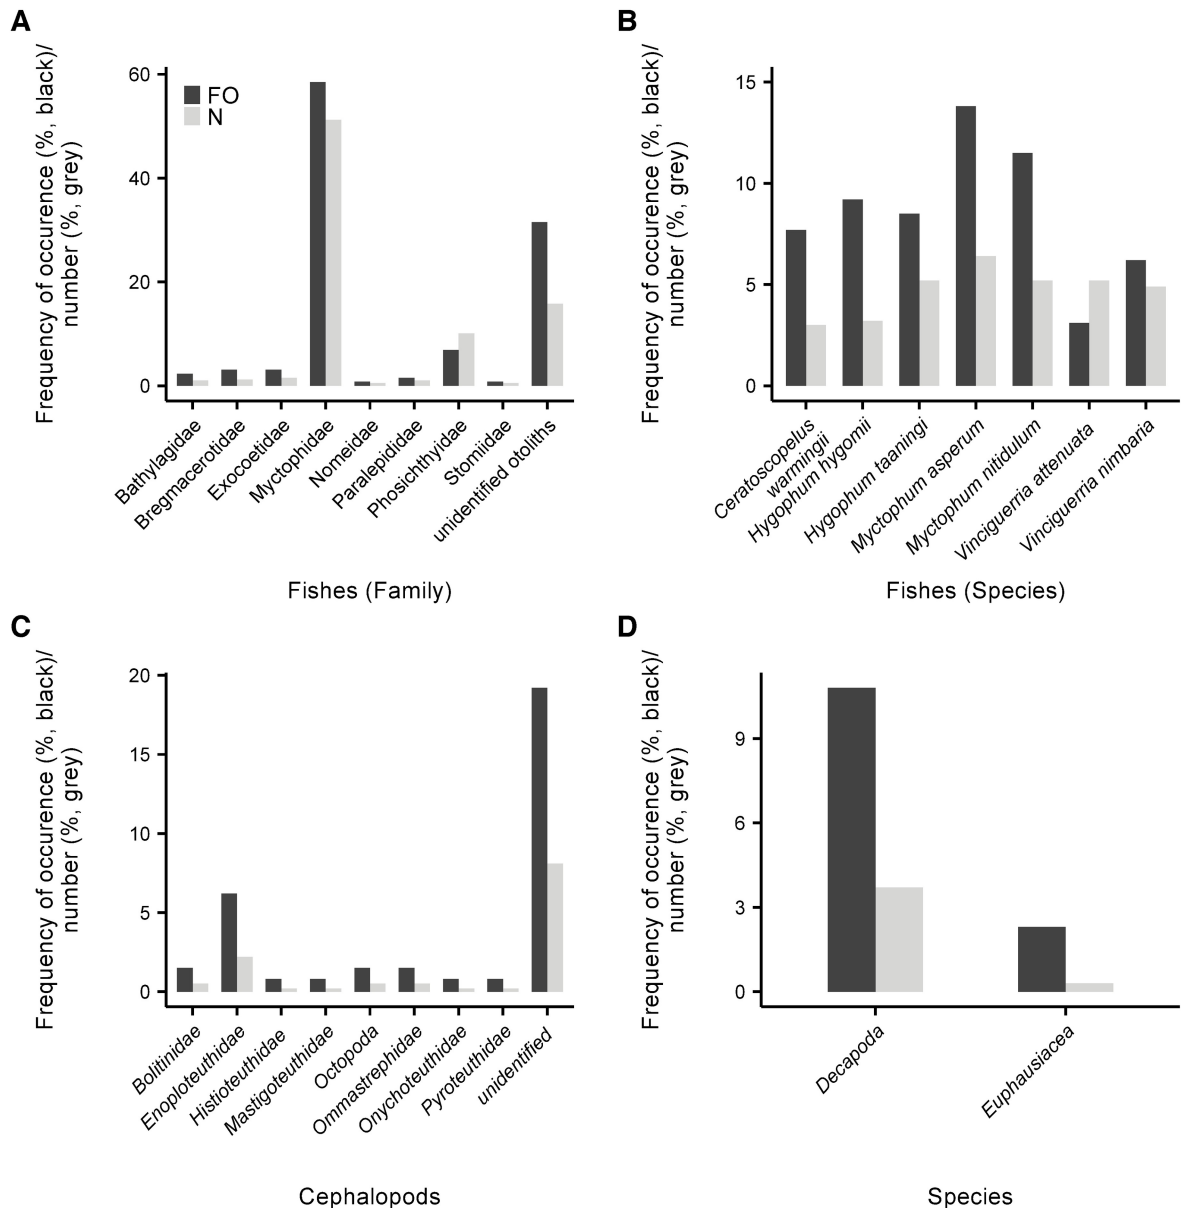

**Fig 3. Frequency of occurrence (FO, black bars) and relative number (N, grey bars) in percent of the stomach contents of *Sthenoteuthis pteropus* (n = 129) caught in the eastern tropical Atlantic in 2015. (A) Fish families (B) Fish species (only a subset of the most abundant species is shown) (C) Cephalopod families (D) Crustaceans.**

<https://doi.org/10.1371/journal.pone.0189691.g003>

contrast to fish otoliths, squid beaks consumed by *S. pteropus* were not dominated by a single taxonomic group. Cephalopod prey were moderately abundant (24–35%) in the stomachs of *S. pteropus* smaller than 40 cm (n = 125) and absent in very large-sized squid (n = 4) (Fig 4).

Approximately 2% of the lower beaks were identified as Enoploteuthidae and were present in 6% of all stomachs. Cirrate octopods made up 0.5% of all crustacean prey and occurred in 1.5% of all stomachs. Besides that, cephalopods from the Bolitinidae, Ommastrephidae, Pyroteuthidae, Mastigoteuthidae, Histioteuthidae and Onychoteuthidae family were present in the stomachs with abundances and occurrences below 2% for each family (Fig 3C). Beaks that could not be identified accounted for the largest grouping and were present in 19% of all

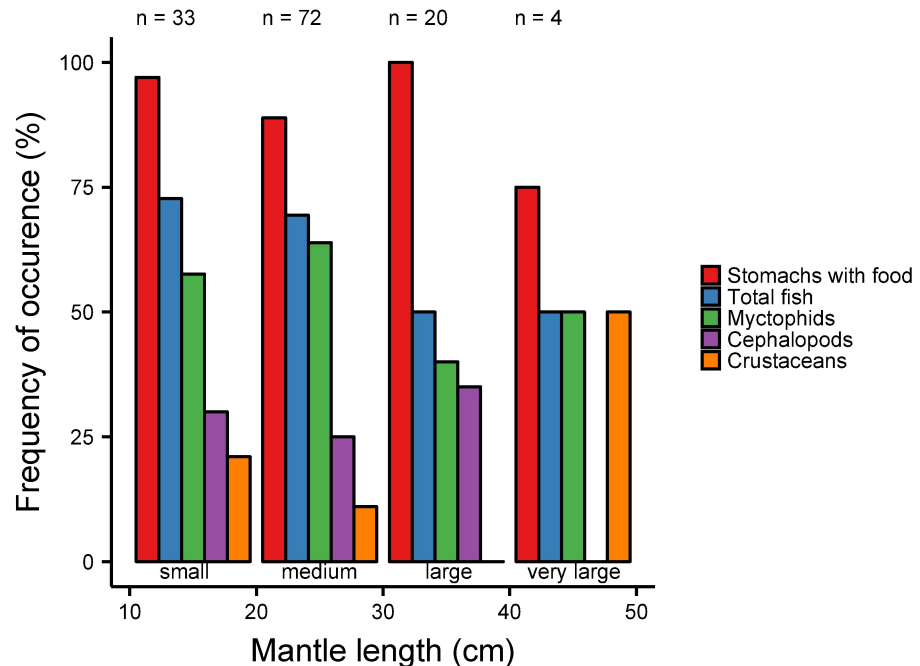

**Fig 4. Frequency of occurrence of the prey groups of 129 specimens of *Sthenoteuthis pteropus* for 10 cm size intervals.** Sample size per size interval: small (11–20 cm) = 33; middle (21–30 cm) = 72; large (31–40 cm) = 20; very large (41–50 cm) = 4.

<https://doi.org/10.1371/journal.pone.0189691.g004>

stomachs and made up 8% of all prey. 13% of all stomachs contained crustaceans, mainly decapods (11%) and euphausiids (2%) (Fig 3D). Decapods could not be identified to species level due to the advanced stage of digestion. Crustaceans had the lowest frequency of occurrence (11–21%) in small- to middle-sized squid and 50% in very large-sized squid

(Fig 4). Crustaceans were not found in stomachs of large-sized squid (n = 20). Of all examined stomachs, 20 included copepods with a total of 198 copepods overall. A total of ten amphipod individuals were found in eight stomachs (Table 3). There was no evidence of recently ingested large prey that could have introduced copepods and amphipods as secondary or transitory prey in the stomachs of *S. pteropus*. The copepods and amphipods occurred almost exclusively in squid caught during May and June (M116). The mantle length of squid containing more than one intact copepod specimen ranged from 15 to 25 cm. The maximum number of copepods found in one individual was 83 (female, ML = 25 cm). All amphipods belong to the suborder Hyperioidea (n = 10). Three specimens were identified as *Vibilia* spp. (Vibiliidae), one as *Hyperietta vosseleri* (Lestrigonidae), two as members of the Phronimoidea and two as Platyscloidea.

## DNA barcoding

The BLAST analyses provided generally low E values, high query covers and high percent identities (Table 4). Ingested cephalopod prey included *Sthenoteuthis pteropus* (Ommastrephidae; n = 5), *Enoploteuthis leptura* (Enoploteuthidae; n = 1) and *Histioteuthis reversa* (Histioteuthidae; n = 2); fish prey included *Lestidium atlanticum* (Paralepididae; n = 1), *Cheilopogon* sp. (Exocoetidae; n = 2), Hemiramphidae (n = 1) and *Myctophum affine/nitidulum* (Myctophidae; n = 1). Crustacean prey included the hyperiid amphipods *Vibilia* sp. (Vibiliidae) and *Hyperietta vosseleri* (Lestrigonidae). Additionally, copepods of the genus *Temora* sp. (Temoridae)

**Table 3. Summary of secondary prey found in the stomach contents of *Sthenoteuthis pteropus* from the eastern tropical Atlantic in 2015 by frequency of occurrence (FO) and number (N).** Secondary prey refers to prey that has been introduced in the stomachs by other prey species.

| Secondary Prey                             | FO        | N          |
|--------------------------------------------|-----------|------------|
| <b>Crustacea</b>                           | <b>31</b> | <b>212</b> |
| <b>Amphipoda (all suborder Hyperiidae)</b> | 10        | 10         |
| <u>Vibilliidae</u>                         |           |            |
| <i>Vibilia</i> spp.                        | 3         | 3          |
| <u>Lestrigonidae</u>                       |           |            |
| <i>Hyperietta vosseleri</i>                | 1         | 1          |
| <u>Phronimoidea</u>                        | 2         | 2          |
| <u>Platysceloidea</u>                      | 2         | 2          |
| unidentified hyperiid amphipod             | 2         | 2          |
| <b>Cladocera</b>                           | 3         | 4          |
| <b>Copepoda</b>                            | 20        | 198        |
| <b>Other</b>                               | <b>4</b>  | <b>10</b>  |
| <b>Chaetognatha</b>                        | 1         | 3          |
| <b>Pteropoda</b>                           | 2         | 6          |
| <b>Algae</b>                               | 1         | 1          |
| <b>Total</b>                               | <b>35</b> | <b>222</b> |

<https://doi.org/10.1371/journal.pone.0189691.t003>

and *Labidocera* sp. (Pontellidae) were identified. Samples that could not be assigned with high confidence to a species were excluded from the analysis. Cannibalistic specimens ranged between 19.0 and 30.5 cm ML.

### Stable isotope analysis

**Stable isotope analysis of muscle tissue.** Muscle  $\delta^{13}\text{C}$  isotope values ranged from -17.3 to -14.8‰ (difference: 2.5‰) and  $\delta^{15}\text{N}$  ranged from 9.7 to 13.3‰ (3.6‰) (Fig 5, Table 5). The difference of 3.6‰ in  $\delta^{15}\text{N}$  in muscle tissue equals an increase by one trophic level [54]. A significant effect of size (ML) was found for muscle  $\delta^{15}\text{N}$  isotope values ( $y = 8.796 + 0.093x$ ,  $r = 0.67$ ,  $F_{1, 51} = 102.1$ ,  $p < 0.001$ ) showing an increase by 2.5 ‰ in  $\delta^{15}\text{N}$  with increasing ML (Fig 5A). No significant relationships were found between  $\delta^{13}\text{C}$  muscle isotope values and sex, maturity stage and location ( $\delta^{13}\text{C}$ :  $p = 0.50$ ,  $r^2 = 0.18$ ,  $F_{10,43} = 0.95$ ) and no relationship between  $\delta^{13}\text{C}$  and mantle length could be observed ( $p = 0.39$ ,  $r^2 = 0.01$ ,  $F_{1, 52} = 0.74$ ). For  $\delta^{15}\text{N}$  and sex, maturity stage and location a marginally significant relationship was found ( $\delta^{15}\text{N}$ :  $p = 0.07$ ,  $r^2 = 0.31$ ,  $F_{10,43} = 1.92$ ) attributed to the fact that male individuals of *S. pteropus* do not grow as large as females and therefore occupy lower size classes with lower  $\delta^{15}\text{N}$  values (Fig 5A).

**Stable isotope analysis of squid gladius.** Ranges of  $\delta^{15}\text{N}$  and  $\delta^{13}\text{C}$  gladius stable isotopes were 5.3–9.2‰ (range: 3.9‰) and -17.8–15.4‰ (range: 2.4‰), respectively (Table 5). Single specimens showed different regimes of  $\delta^{15}\text{N}$  and  $\delta^{13}\text{C}$  (Fig 6). However, grouping of the gladius stable isotope data showed a significant increase in  $\delta^{15}\text{N}$  and  $\delta^{13}\text{C}$  with increasing gladius length (Fig 6C and 6D,  $\text{GAM}_{\delta^{15}\text{N}}$ ,  $\text{edf} = 2.4$ ,  $F = 2.8$ ,  $p < 0.05$ ,  $r^2 = 0.14$ ;  $\text{GLS}_{\delta^{13}\text{C}}$ ,  $t = 3.9$ ,  $p < 0.01$ ). The largest squid analyzed (Individual C) showed a total increase in  $\delta^{15}\text{N}$  of 3.3‰ from the earliest gladius section to the most recent (5.3‰  $\delta^{15}\text{N}$  at 16 cm GL to 8.6‰  $\delta^{15}\text{N}$  at 36 cm GL), accompanied by an increase of 1‰ in  $\delta^{13}\text{C}$  (-17.0‰  $\delta^{13}\text{C}$  at 16 cm GL to -16.0‰  $\delta^{13}\text{C}$  at 36 cm GL). Individual A showed fluctuating isotopic values with decreasing and increasing  $\delta^{15}\text{N}$  and  $\delta^{13}\text{C}$ . Opposite to individual A, individual D did not show high fluctuations in  $\delta^{15}\text{N}$

**Table 4. Sequenced samples of prey items collected in the stomachs of *Sthenoteuthis pteropus* in the tropical eastern Atlantic in 2015.**

| Order                | Family          | Highest hit identified by BLAST     | Query cover | Identity | E value    | Total score | Sequence length |
|----------------------|-----------------|-------------------------------------|-------------|----------|------------|-------------|-----------------|
| Squids               |                 |                                     |             |          |            |             |                 |
| Oegopsida            | Enoploteuthidae | <i>Enoploteuthis leptura</i>        | 97%         | 99%      | 0.0        | 1027        | 589             |
| Teuthida             | Ommastrephidae  | <i>Sthenoteuthis pteropus</i>       | 100%        | 97%      | 4,00e-173  | 618         | 366             |
| Teuthida             | Ommastrephidae  | <i>Sthenoteuthis pteropus</i>       | 100%        | 99%      | 0.0        | 1067        | 594             |
| Teuthida             | Ommastrephidae  | <i>Sthenoteuthis pteropus</i>       | 100%        | 99%      | 0.0        | 806         | 440             |
| Teuthida             | Ommastrephidae  | <i>Sthenoteuthis pteropus</i>       | 100%        | 99%      | 0.0        | 922         | 531             |
| Teuthida             | Ommastrephidae  | <i>Sthenoteuthis pteropus</i>       | 100%        | 100%     | 9.00 e-47  | 200         | 108             |
| Teuthida             | Histioteuthidae | <i>Histioteuthis reversa</i>        | 96%         | 95%      | 0.0        | 502         | 596             |
| Teuthida             | Histioteuthidae | <i>Histioteuthis reversa</i>        | 100%        | 94%      | 0.0        | 852         | 548             |
| Fishes               |                 |                                     |             |          |            |             |                 |
| Aulopiformes         | Paralepididae   | <i>Lestidium atlanticum</i>         | 99%         | 98%      | 0.0        | 1040        | 622             |
| Beloniformes         | Exocoetidae     | <i>Cheilopogon sp.</i>              | 100%        | 98%      | 0.0        | 672         | 391             |
| Beloniformes         | Exocoetidae     | <i>Cheilopogon sp.</i>              | 100%        | 98%      | 0.0        | 966         | 556             |
| Beloniformes         | Hemiramphidae   | Hemiramphidae sp.                   | 100%        | 93%      | 0.0        | 865         | 579             |
| Myctophiformes       | Myctophidae     | <i>Myctophum affine/nitidulum</i>   | 100%/99%    | 99%/97%  | 0.0        | 973/919     | 552             |
| Crustaceans          |                 |                                     |             |          |            |             |                 |
| Amphipoda            | Vibiliidae      | <i>Vibilia spec.</i>                | 100%        | 85%      | 6,00e-179  | 608         | 549             |
| Amphipoda            | Lestrigonidae   | <i>Hyperietta vosseleri</i>         | 90%         | 88%      | 0.0        | 719         | 628             |
| Calanoida            | Temoridae       | <i>Temora stylifera</i>             | 100%        | 99%      | 5.00 e-86  | 327         | 186             |
| Calanoida            | Pontellidae     | <i>Labidocera sp.</i>               | 99%         | 82%      | 3.00 e-131 | 479         | 479             |
| Calanoida            | Temoridae       | <i>Temora stylifera/ discaudata</i> | 94%/93%     | 89%/85%  | 0.0        | 1059/655    | 625             |
| Reference collection |                 |                                     |             |          |            |             |                 |
| Oegopsida            | Enoploteuthidae | <i>Enoploteuthis leptura</i>        | 96%         | 85%      | 0.0        | 645         | 600             |
| Teuthida             | Ommastrephidae  | <i>Sthenoteuthis pteropus</i>       | 98%         | 97%      | 0.0        | 1040        | 645             |
| Teuthida             | Histioteuthidae | <i>Histioteuthis reversa</i>        | 100%        | 94%      | 0.0        | 948         | 594             |

<https://doi.org/10.1371/journal.pone.0189691.t004>

(range between 7.4 and 8.3 ‰); instead a steady increase of  $\delta^{13}\text{C}$  from -16.9 ‰ to -16 ‰ was observed. The  $\delta^{15}\text{N}$  and  $\delta^{13}\text{C}$  values of all individuals revealed that the trophic position and foraging habitat varied at short time intervals over their entire life span. However, all large individuals showed the same pattern of  $\delta^{15}\text{N}$  and  $\delta^{13}\text{C}$  which slowly increased after reaching a GL of approximately 20–25 cm. The isotopic values of the male individual (individual F) were in the range of females and also showed high variability. No relationship was found between stable isotope values in gladii and muscle tissue and the location of capture.

## Discussion

The present study on the feeding ecology of *Sthenoteuthis pteropus* revealed three major findings. 1) Stomach content data obtained during 2015 showed that juvenile and adult *S. pteropus* mainly prey on myctophids, but that they also show an opportunistic and variable feeding behavior. No ontogenetic size related diet shift in prey composition was detected; this was probably because of the small sample size of large squid. 2) The muscle tissue stable isotope analysis showed an overall increase in  $\delta^{15}\text{N}$  corresponding with the growth of the squid (assuming a constant isotopic baseline). The  $\delta^{13}\text{C}$  isotopic values did not show any trend with increasing ML and therefore indicated no consistent change in migration behaviour with growth, thus suggesting that individuals have different foraging areas.

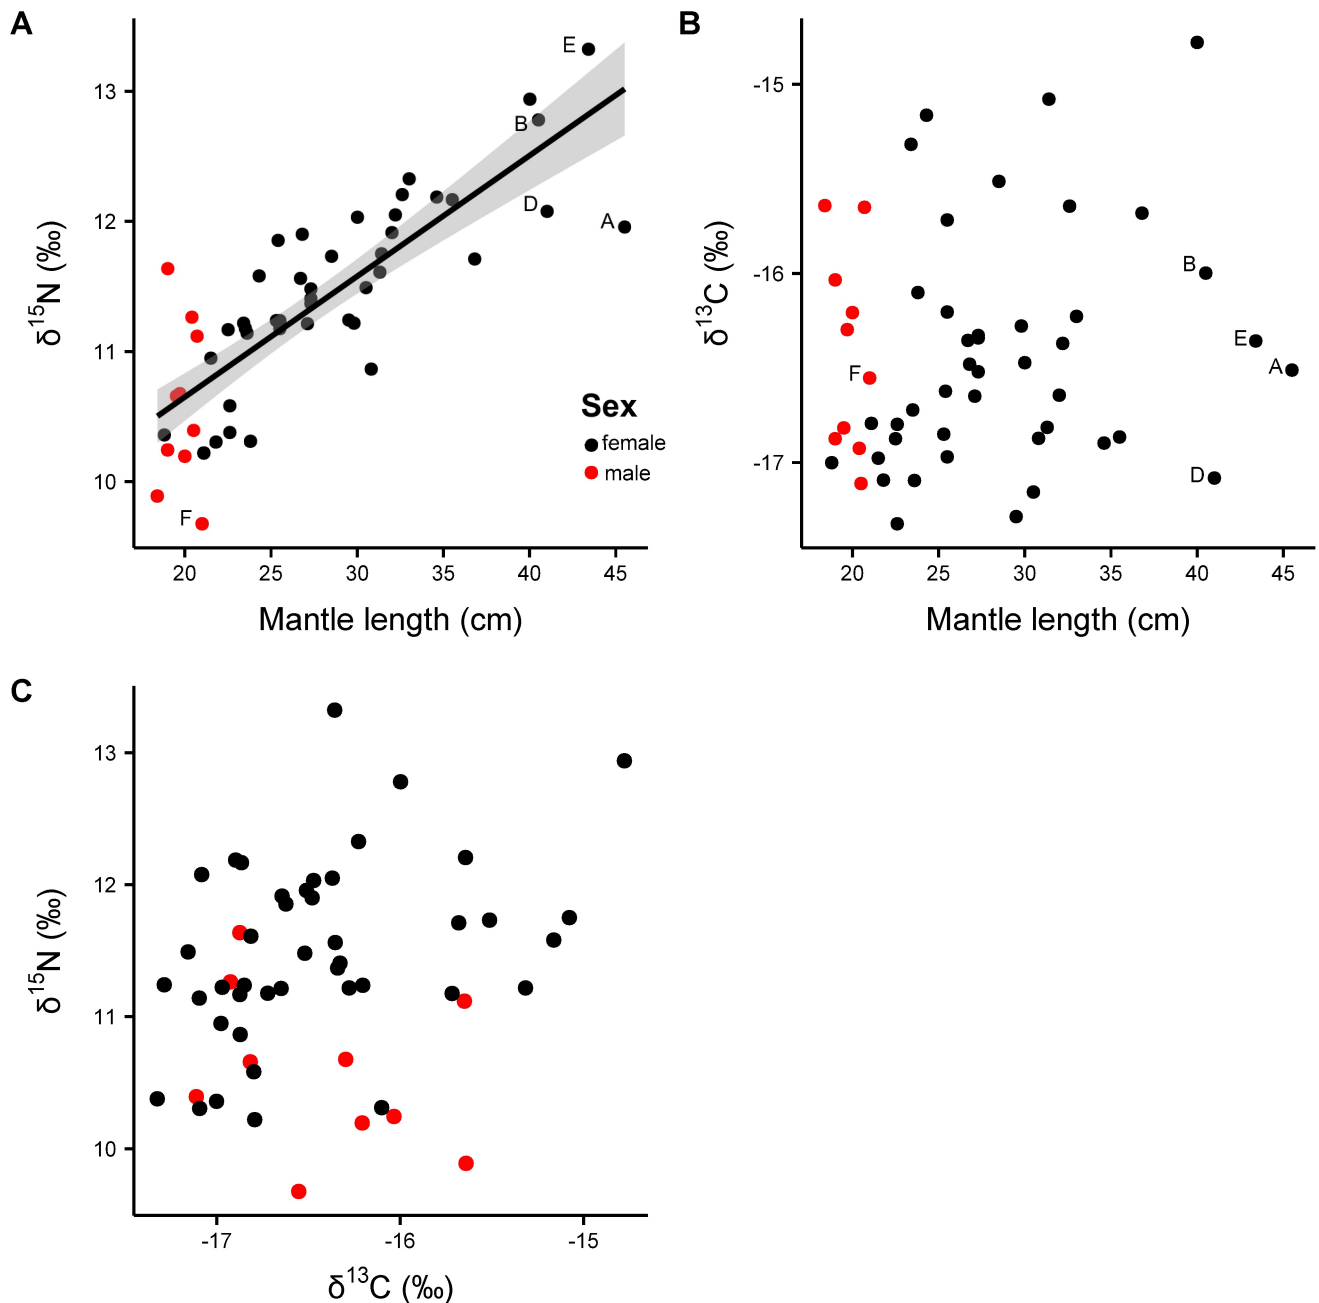

**Fig 5. Isotopic values of muscle tissue (n = 54) in relation to mantle length of *Sthenoteuthis pteropus* caught in the eastern tropical Atlantic in 2015.** (A)  $\delta^{15}\text{N}$  in ‰ of muscle tissue; the smoother curve (method = GAM) was adapted by the function  $y \sim s(x, k = 4)$ ; the shaded area is the 95% confidence interval for predictions; (B)  $\delta^{13}\text{C}$  ‰ of muscle tissue; without regression line since this one was not significant; (C) Gender specific biplot of stable isotope values of muscle tissue (n = 54) of *Sthenoteuthis pteropus* caught in the eastern tropical Atlantic in 2015; The labeled data points (A–F) correspond to the individuals on which gladius stable isotope analysis was applied (see Table 5).

<https://doi.org/10.1371/journal.pone.0189691.g005>

3) The reconstruction of the feeding chronology of individual squid via incremental gladius stable isotope analysis did not reveal a continuous increase in trophic position during the squid's entire life. However, a significant increase in  $\delta^{15}\text{N}$  and  $\delta^{13}\text{C}$  was observed when squid exceeded ca. 20 cm GL which corresponded to the isotope data from the muscle tissue. Furthermore, gladius analyses suggested substantial individual variations in trophic positions and foraging area.

**Table 5. Size, location of capture, isotope values and C/N mass ratios of the five large *Sthenoteuthis pteropus* females and the small male individual caught during cruise MSM49 in 2015 in the eastern tropical Atlantic.**

| Individual | Size [cm] | Latitude (°N) | Longitude (°W) | Mantle                |                       |     | Gladius               |     |     |                       |       |       |      |     |     |
|------------|-----------|---------------|----------------|-----------------------|-----------------------|-----|-----------------------|-----|-----|-----------------------|-------|-------|------|-----|-----|
|            |           |               |                | $\delta^{15}\text{N}$ | $\delta^{13}\text{C}$ | C/N | $\delta^{15}\text{N}$ |     |     | $\delta^{13}\text{C}$ |       |       | C/N  |     |     |
|            |           |               |                |                       |                       |     | mean                  | max | min | mean                  | max   | min   | mean | max | min |
| A          | 45.5      | 18.0835       | 22.0007        | 11.9                  | -16.5                 | 3.7 | 7.0                   | 8.0 | 6.2 | -16.9                 | -15.7 | -17.8 | 4.5  | 4.7 | 4.3 |
| B          | 40.5      | 17.1622       | 21.9218        | 12.8                  | -16.0                 | 3.4 | 7.6                   | 8.0 | 7.3 | -16.4                 | -16.1 | -17.3 | 4.5  | 4.7 | 4.4 |
| C          | 47.5      | 17.1622       | 21.9218        | 11.3                  | -16.9                 | 3.7 | 6.5                   | 8.6 | 5.3 | -16.7                 | -16.0 | -17.1 | 4.5  | 4.6 | 4.4 |
| D          | 41.0      | 17.1853       | 21.9612        | 12.1                  | -17.1                 | 3.8 | 7.8                   | 8.3 | 7.4 | -16.6                 | -16.0 | -16.9 | 4.4  | 4.8 | 4.3 |
| E          | 43.4      | 16.2032       | 21.3085        | 13.3                  | -16.4                 | 3.6 | 8.3                   | 9.2 | 7.5 | -16.1                 | -15.4 | -17.5 | 4.4  | 4.6 | 4.0 |
| F          | 21.0      | 18.0835       | 22.0007        | 9.7                   | -16.6                 | 3.5 | 6.5                   | 7.6 | 5.9 | -16.7                 | 16.4  | -17.2 | 4.6  | 4.6 | 4.5 |

<https://doi.org/10.1371/journal.pone.0189691.t005>

### Stomach content analysis—visual and DNA analysis

The diet of *Sthenoteuthis pteropus* consisted mainly of myctophid fishes, which is also the main prey item of many other ocean squids including gonatids [55] and ommastrephids [56,57]. A total of 30 different myctophid species were found in the stomachs of *S. pteropus*, but *Myctophum asperum* and *M. nitidulum* dominated. These species are among the most abundant myctophid fishes that undertake diel vertical migration in the tropical and sub-tropical Pacific [58] but little information is available on these species in the Atlantic [59]. *Myctophum asperum* and *M. nitidulum* can reach a maximal length of 8.5 cm and 8.3 cm, respectively and prey on small crustaceans such as copepods and amphipods [58,60]. Adults of both species feed mainly in the epipelagic zone at night within the upper 1 m layer and descend to deeper layers during the day; thus they represent a relevant role in the transfer of energy from sea

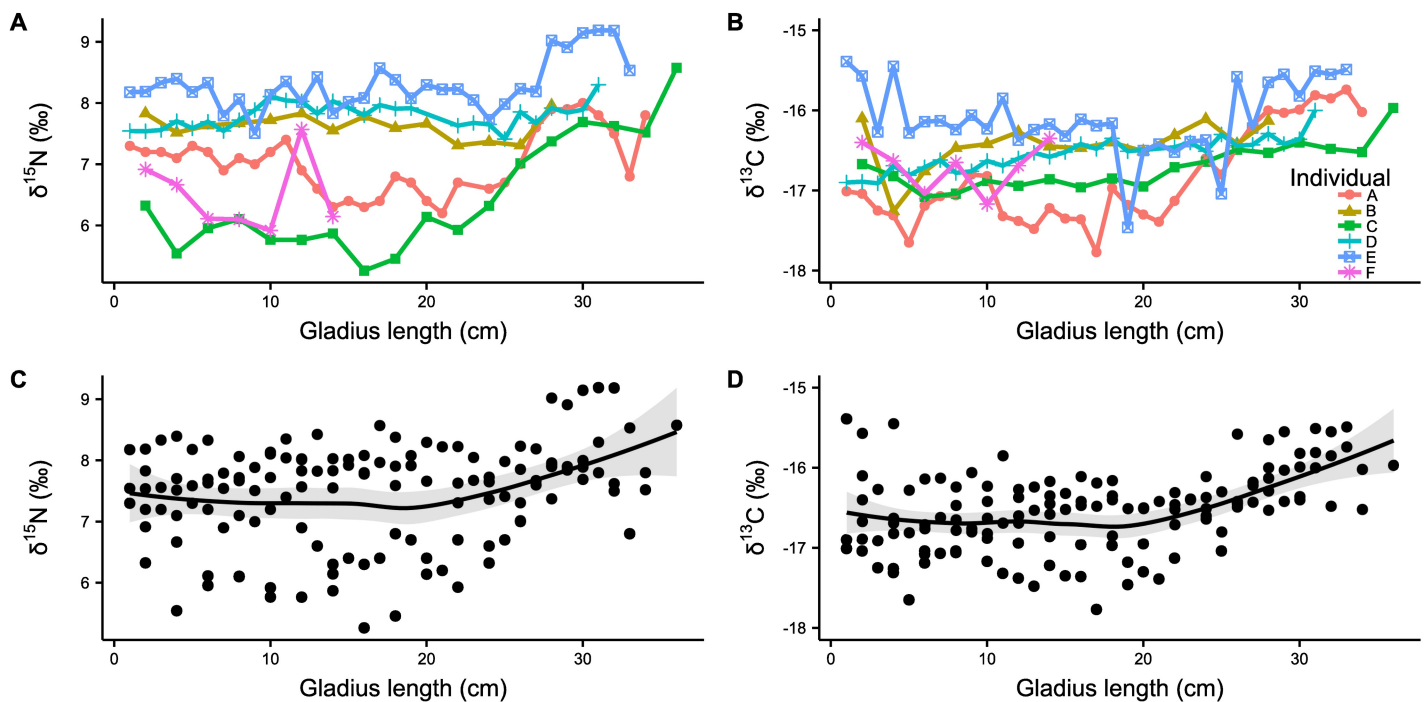

**Fig 6. Stable isotope values along the gladius length.** (A)  $\delta^{15}\text{N}$  and (B)  $\delta^{13}\text{C}$  stable isotope values of the five large female *Sthenoteuthis pteropus* (A–E) and the small male individual (F) caught in the eastern tropical Atlantic in 2015. (C) Grouped  $\delta^{15}\text{N}$  values (D) Grouped  $\delta^{13}\text{C}$  values. Lines represent significant relationships ( $\delta^{15}\text{N}$ :  $p < 0.05$ ;  $\delta^{13}\text{C}$ :  $p < 0.01$ ).

<https://doi.org/10.1371/journal.pone.0189691.g006>

surface layers to the deep. Late juveniles and adult squid rise to the epipelagic layer at night to forage (0–150 m) and descend down to 800–1200 m in the morning [17]. By doing so *S. pteropus* actively transports carbon from the upper ocean layers into deeper regions. Individual squid had up to nine species of myctophids in their stomachs, stressing the diverse prey spectrum of *S. pteropus*. Such diversity of prey species is known from other squid species [3] and could be explained by the migratory behavior of *S. pteropus*. However, many different myctophid species are able to coexist due to resource-partitioning of vertical distribution and diet [61,62]. Therefore the diversity in prey species could also be due to co-existence of different myctophid species in the same habitat. The high number of prey taxa of *S. pteropus* indicates that this squid is an opportunistic predator. Besides fishes, *S. pteropus* also preyed upon cephalopods and crustaceans. A dietary shift during growth from crustacean-dominated prey to fish and cephalopod-dominated prey was not apparent from the stomach contents. This was probably due to the small sample size of large squid (4 very large and 125 small to large individuals) and the squid's opportunistic feeding behavior. The dominance of fishes and squids in the stomachs examined might be related to their local abundance and availability as potential prey items, but also that *S. pteropus* selectively predate on these groups. When cephalopods and crustaceans were found in squid stomachs they mostly occurred as single individuals, whereas fish remains were found in higher numbers. This suggests that either *S. pteropus* feeds on fish schools or that fish otoliths accumulate in the stomachs over several meals. The latter would result in a biased frequency of occurrence and number [56]. DNA barcoding revealed that *S. pteropus* feeds on conspecifics. This finding was not observed in the visual investigation of the stomach contents because beaks were too small and eroded to be identified to species level. Contamination is unlikely since *S. pteropus* sequences were not systematically found in all samples, and were the only sequence that did amplify when found. Furthermore, only very clean sequences were analyzed and the dissection kit was cleaned after each sample. Cannibalism has been reported for several cephalopods [4,55]. Cannibalistic behaviour can provide a competitive advantage among juveniles and/or adults during episodes of food scarcity [63] and can be a regulating factor to reduce intra-specific competition [64]. Cannibalism could also be artificially induced by jig fishing [55] as has been shown in Humboldt squid which occurs in high abundances in the Pacific Ocean [56]. During our fishing operations we only observed squid in very small schools and therefore the observed cannibalism is likely a natural component of the feeding behaviour of *S. pteropus* as was suggested for gonatid squid [55].

### Zooplankton as prey

High numbers of copepods and some hyperiid amphipods were found in some of the examined squid stomachs. The crustaceans were intact, undigested and there were no fish or crustaceans present in the stomachs that could have introduced them to the squid's stomachs as secondary or transitory prey. It is unlikely that the squid actively predate individually on these copepods and hyperiids. Some of the encountered amphipods and copepods are known to be symbionts or prey of gelatinous zooplankton [65–67]. Therefore, these crustaceans could have entered the stomachs of *S. pteropus* with the gelatinous fauna, suggesting that squid had been feeding on gelatinous zooplankton (e.g. salps, medusae, siphonophores, pyrosomes). Ingested gelatinous zooplankton is subject to rapid digestion, a process that continues after capture even when specimens are being frozen [68]. In the eastern tropical Atlantic *S. pteropus* has been found to feed on pyrosomes where they were abundant [69]. Almost all amphipods found in the stomachs of *S. pteropus* belong to the suborder Hyperiididae. Members of the hyperiid genus *Vibilia* sp. are well-known symbionts of salps [65,66]. One amphipod belonging to the superfamily Phronimoidea also associates with salps, ctenophores, scyphozoans and



antho- and leptomedusan hydrozoans [66,70–73]. One other encountered amphipod was assigned to Platysceloidea and this superfamily mostly associates with siphonophores or in some cases with medusae [70,71,74]. High abundances of gelatinous zooplankton [75] as well as cephalopods [76] have been found in the equatorial upwelling region and subtropical and tropical waters of the Atlantic, respectively, where our samples were taken. Gelatinous zooplankton play an important role in energy and matter transformation and its direct importance as prey may be largely underestimated [69,77]. Even though it is of low caloric value due to its high water content, a large predator may satisfy parts of its energy requirements by preying on large amounts of gelatinous zooplankton [78] and focusing on body parts of higher energetic value such as gonads or stomachs. Furthermore, the low energy content may be compensated for by faster digestion [68]. Although gelatinous zooplankton taxa are increasingly recognized as an important prey for higher trophic predators [78–80], only few accounts exist to date for cephalopods [68,81–84]. Our findings present a good case for why it is probable that *S. pteropus* is also consuming gelatinous zooplankton (i.e. salps, medusa) in the eastern tropical Atlantic.

### Stable isotope analysis of squid gladii

The stable isotope analysis of *S. pteropus* gladii provided a broad picture of its feeding ecology. Our results showed not only an increase from lower to higher trophic level prey in some individuals, but also strong individual variation in all squid throughout their entire life. Although all individuals showed different  $\delta^{15}\text{N}$  baselines as juvenile squid,  $\delta^{15}\text{N}$  in gladii tissue increased significantly with a GL > 20 cm. The individuals C and E showed a particularly steep increase. These findings are in line with the mantle stable isotope measurements reported in this study, showing an increase in  $\delta^{15}\text{N}$  by 2.5 ‰ from 15.0 to 47.5 cm ML. The high variation in nitrogen stable isotopes observed in all individuals could be explained by movements into foraging areas with different isotopic baseline values since this species is highly migratory [17]. *Sthenoteuthis pteropus* is able to temporarily live in a pronounced oxygen minimum zone (OMZ) [5,17,19] and undergoes intense vertical migration [17]. In the absence of oxygen, bacteria use nitrate to consume organic matter (denitrification). Denitrification preferentially removes  $^{14}\text{N}\text{-NO}_3^-$  and leaves residual nitrate  $^{15}\text{N}$ -enriched [85] which leads to an increase in the baseline  $\delta^{15}\text{N}$  [29,86]. Additionally,  $\delta^{15}\text{N}$  values of marine predators are affected by vertical migration. Predators feeding on mesopelagic prey resources have higher  $\delta^{15}\text{N}$  values than predators feeding on epipelagic prey [87,88] possibly as an effect of nutrient cycling [89–91]. Therefore, variation in  $\delta^{15}\text{N}$  can only be interpreted as a shift in trophic position when the squid does not change foraging area (no change in  $\delta^{13}\text{C}$ ), because such a change may affect the  $\delta^{15}\text{N}$  baseline [29]. Without a  $\delta^{15}\text{N}$  baseline we cannot clearly distinguish between an increase in trophic position and an increase in  $\delta^{15}\text{N}$  baseline values due to horizontal or vertical migration. The  $\delta^{13}\text{C}$  values of the most recent gladius increments of the five large squid (A, B, C, D and E) were similar suggesting that they foraged in the same habitat before capture. However, during their lifetime  $\delta^{13}\text{C}$  values fluctuated substantially in all individuals and increased significantly after 20 cm GL. *Sthenoteuthis pteropus* spawns in the eastern equatorial Atlantic and its early life stages are quickly dispersed in the equatorial zone [17,19]. Females from the northern population (north of equator) migrate about 2500 km during the summer from the Cape Verde Islands up to Madeira and back [19]. Immature and mature females form several large groups in different geographical ranges with immature females occupying colder waters and mature females inhabiting warmer waters [19]. Zuev and Nikolsky [19] identified two distinct size groups of mature females in the same region where we sampled: an equatorial and a northeastern group. From December until May these two groups merge and in June until November

they separate again [19]. These differences in migratory behavior may explain the differences in  $\delta^{13}\text{C}$  and  $\delta^{15}\text{N}$  in the gladii of the five individuals throughout almost their entire life and suggest that they foraged in different habitats with different isotopic baselines. The  $\delta^{13}\text{C}$  signature follows productivity. It shows higher values in productive nearshore waters, such as upwelling zones. In less productive offshore regions, the  $\delta^{13}\text{C}$  signature has lower values. In pelagic ecosystems the  $\delta^{13}\text{C}$  signatures are lower at higher latitudes than at lower latitudes. [29]. All females analyzed in this study were caught at low latitudes close to a productive upwelling zone. This could explain the significant increase in  $\delta^{13}\text{C}$  in individuals larger than 20 cm GL. However, many of the prey of *S. pteropus* also migrates and hence are also affected by different stable isotope baselines, whose signatures then manifests in the predatory squid. Analyses of squid and prey isotope signatures from multiple years and seasons are needed to draw a full picture of *S. pteropus* trophic ecology, identify environmental effects and trace down the causes of variation in stable isotope signatures.

### Individual variation in *Sthenoteuthis pteropus*

Although several studies stress that individual ecology varies widely among species and populations [45,88,92,93], traditionally, conspecific individuals are considered to be ecologically equivalent. In this study, gladii isotopic values showed strong intra- and inter-individual variation over time and body size. Overlapping  $\delta^{13}\text{C}$  and  $\delta^{15}\text{N}$  values were observed among some individuals, indicating foraging in similar habitats and at similar trophic levels, but every examined squid revealed a unique isotopic pattern throughout its life. The variable and strong intra-individual variation in isotopic shifts that were observed along the proostracum are in accordance with other studies (*Dosidicus gigas* and *Berryteuthis magister*) suggesting a complex life history of these squids [3,28,45,94]. Squid may conform their foraging strategies to prey availability that changes with season, year and habitat. Spatial and temporal variation in prey availability combined with phenotypic differences between *S. pteropus* individuals may shift the squid populations from generalists to foraging specialists [3,95,96]. This hypothesis is supported by the findings of Ruiz-Cooley et al. [21] and Hunsicker et al. [3], which suggest that the variable but increasing  $\delta^{15}\text{N}$  values along the proostracum of *Dosidicus gigas* and *Berryteuthis magister* are an effect of prey availability and optimal foraging strategy. The increasing but variable  $\delta^{15}\text{N}$  values suggest that *S. pteropus* opportunistically feeds on available prey [17], but as it grows it becomes able to consume prey from higher trophic levels. For example,  $\delta^{15}\text{N}$  in muscle from *Ommastrephes bartramii* over 4 years differed significantly, possibly due to changes in prey consumption [97]. The largest female (Individual C; 47.5 cm ML) investigated in this study had 1 to 2‰ lower  $\delta^{15}\text{N}$  isotopic values in muscle tissue than the other four large females (> 40 cm ML). Its trophic position (with  $\delta^{15}\text{N}$  of 11.3 ‰) seems to be similar to squid smaller than 30 cm. Stable isotope data from muscle would have lead us to incorrectly assume that squid individual C occupies the lowest trophic position compared with the other four large individuals. However, gladii data showed that  $\delta^{15}\text{N}$  values of all squid were different throughout their life and individual C hatched in a region with the lowest  $\delta^{15}\text{N}$  baseline of all the large individuals investigated. This finding emphasizes individual variation that can only be detected by applying multiple techniques. Individual variation as observed here may have been underestimated in previous studies on feeding in oceanic squid, but may have potentially important ecological, evolutionary and conservation implications [92,93].

### Stable isotope analysis of muscle

$\delta^{15}\text{N}$  values of the muscle tissue of *S. pteropus* had a range of 3.6‰, with a significant increase by around 2.5 ‰ as the squid grows to a ML of around 40 cm. This is the equivalent to an

increase of one trophic level [54]. Since this species can reach a ML of about 65 cm [17], it is likely that its  $\delta^{15}\text{N}$  values would continue to increase when growing larger than 40 cm. These findings are in accordance with previous studies on oceanic squids e.g. *Dosidicus gigas*, *Ommastrephes bartramii*, *Todarodes filippovae* and *Beryteuthis magister* which show an increase of one trophic level in  $\delta^{15}\text{N}$  by  $\sim 4\text{‰}$ ,  $\sim >5\text{‰}$ ,  $\sim 3\text{‰}$  and  $3.5\text{‰}$ , during ontogeny respectively [3,21,22,97]. The findings of our study have to be interpreted with caution, since this shift was not detected in the stomach content analysis, probably because of the small sample size of large squid. Additionally, the observed increase in  $\delta^{15}\text{N}$  could also be due to squid migrating into areas with different isotopic baselines or an increase in foraging depth, facilitated by the growing swimming capacities of adult squid.  $\delta^{13}\text{C}$  values did not show any trend with increasing body size, revealing individual differences in foraging areas with no consistent migration pattern; a trend that was also seen in other studies [3,22]. In the open ocean a considerable part of predation pressure on fish stocks may originate from epipelagic ommastrephid squids. Their role as predators and their transfer of energy and nutrients from the mesopelagic food web to higher trophic levels may be underestimated (1). Furthermore, squids cope well with changing ocean environments (9) that are detrimental for other species. The eastern tropical Atlantic is characterized by a pronounced oxygen minimum zone (OMZ) (65,66) which is expanding due to global warming and eutrophication (67,68). *Sthenoteuthis pteropus* is adapted to temporarily live in environments with low oxygen concentrations by anaerobic metabolism (5) and active migration (17), whereas OMZ expansion reduces the habitat for fast swimming fishes (69). The continuing depletion of predatory fish communities (70) may reduce predation pressure on juvenile *S. pteropus* in the eastern tropical Atlantic. How the eastern tropical Atlantic population of *S. pteropus* responds to this ongoing environmental and ecological changes needs to be subject for further research.

## Supporting information

**S1 Fig. Corrected and uncorrected  $\delta^{13}\text{C}$  values of the gladii tissue stable isotope analysis of *Sthenoteuthis pteropus* caught in 2015 Lipid corrections on  $\delta^{13}\text{C}$  values of gladii tissue according to Post et al. 2007.**

(PDF)

**S2 Fig. Overview of the stomach fullness indices of *Sthenoteuthis pteropus* from 2015 caught during the cruises MSM49, M119 and M116.**

(EPS)

## Acknowledgments

We thank the crew of the R/V *Meteor* and *Maria S. Merian* for collecting squid and Toste Tanuha for providing us specimens. Thanks to Stefanie Ismar for her help in the identification of exoskeleton of crustaceans and Werner Schwarzhans and Unai Markaida for the identification of otoliths. We also thank Alexandra Lischka for helping processing the squid, Xupeng Chi for helping preparing samples for the stable isotope analysis, Kosmas Hench for graphical advice and Thomas Hansen for technical support. We would also like to thank two anonymous reviewers for their useful comments that contributed to improve the quality and clarity of the manuscript. Financial support for this study came from a grant (CP1218) to Henk-Jan T. Hoving of the Cluster of Excellence 80 “The Future Ocean”. “The Future Ocean” is funded within the framework of the Excellence Initiative by the Deutsche Forschungsgemeinschaft (DFG) on behalf of the German federal and state governments. Shiptime and associated financial support were provided by the DFG (grant MSM49 to Bernd Christiansen).

## Author Contributions

**Conceptualization:** Henk-Jan T. Hoving.

**Data curation:** Véronique Merten.

**Formal analysis:** Véronique Merten, Jamileh Javidpour, Oscar Puebla.

**Funding acquisition:** Bernd Christiansen, Oscar Puebla, Henk-Jan T. Hoving.

**Investigation:** Véronique Merten, Rebeca Gasca.

**Methodology:** Henk-Jan T. Hoving.

**Project administration:** Henk-Jan T. Hoving.

**Resources:** Bernd Christiansen, Henk-Jan T. Hoving.

**Supervision:** Henk-Jan T. Hoving.

**Validation:** Jamileh Javidpour, Henk-Jan T. Hoving.

**Visualization:** Véronique Merten.

**Writing – review & editing:** Bernd Christiansen, Jamileh Javidpour, Uwe Piatkowski, Oscar Puebla, Rebeca Gasca, Henk-Jan T. Hoving.

## References

1. Rodhouse PG, Nigmatullin CM. Role as consumers. *Philos Trans R Soc London B Biol Sci.* 1996; 351: 1003–1022.
2. Markaida U. Food and feeding of jumbo squid *Dosidicus gigas* in the Gulf of California and adjacent waters after the 1997–98 El Niño event. *Fish Res.* 2006; 79: 16–27. <https://doi.org/10.1016/j.fishres.2006.02.016>
3. Hunsicker ME, Essington TE, Aydin KY, Ishida B. Predatory role of the commander squid *Beryteuthis magister* in the eastern Bering Sea: Insights from stable isotopes and food habits. *Mar Ecol Prog Ser.* 2010; 415: 91–108. <https://doi.org/10.3354/meps08750>
4. Boyle PR, Rodhouse P. *Cephalopods: Ecology and fisheries.* Wiley-Blackwell; 2005.
5. Shulman GE, Chesalin M V., Abolmasova, Yuneva TV, Kideys A. Metabolic strategy in pelagic squid of genus *Sthenoteuthis* (Ommastrephidae) as the basis of high abundance and productivity: An overview of the Soviet investigations. *Bull Mar Sci.* 2002; 71: 815–836.
6. Wells MJ, Clarke A. Energetics: The costs of living and reproducing for an individual cephalopod. *Philos Trans R Soc London Ser B Biol Sci.* 1996; 351: 1083–1104.
7. Piatkowski U, Pierce GJ, Morais da Cunha M. Impact of cephalopods in the food chain and their interaction with the environment and fisheries: An overview. *Fish Res.* 2001; 52: 5–10. [https://doi.org/10.1016/S0165-7836\(01\)00226-0](https://doi.org/10.1016/S0165-7836(01)00226-0)
8. Clarke MR. The role of cephalopods in the world's oceans: An introduction. *Philos Trans R Soc London Biol Sci. The Royal Society;* 1996; 351: 979–983.
9. Doubleday ZA, Prowse TAA, Arkhipkin A, Pierce GJ, Semmens J, Steer M, et al. Global proliferation of cephalopods. *Curr Biol.* 2016; 26: 387–407.
10. Smale MJ. Cephalopods as prey. IV. Fishes. *Philos Trans R Soc London Biol Sci.* 1996; 351: 1067–1081.
11. Clarke MR. Cephalopods as prey. III. Cetaceans. *Philos Trans R Soc London Biol Sci.* 1996; 351: 1053–1065.
12. Caddy JF, Rodhouse PG. Cephalopod and groundfish landings: Evidence for ecological change in global fisheries? *Rev Fish Biol Fish.* 1998; 8: 431–444. <https://doi.org/10.1023/A:1008807129366>
13. Hoving HJT, Gilly WF, Markaida U, Benoit-Bird KJ, Brown ZW, Daniel P, et al. Extreme plasticity in life-history strategy allows a migratory predator (jumbo squid) to cope with a changing climate. *Glob Chang Biol.* 2013; 19: 2089–2103. <https://doi.org/10.1111/gcb.12198> PMID: 23505049
14. Zeidberg LD, Robison BH. Invasive range expansion by the Humboldt squid, *Dosidicus gigas*, in the eastern North Pacific. *Proc Natl Acad Sci U S A.* 2007; 104: 12948–129450. <https://doi.org/10.1073/pnas.0702043104> PMID: 17646649

15. Stewart JS, Hazen EL, Bograd SJ, Byrnes JEK, Foley DG, Gilly WF, et al. Combined climate- and prey-mediated range expansion of Humboldt squid (*Dosidicus gigas*), a large marine predator in the California Current System. *Glob Chang Biol*. 2014; 20: 1832–1843. <https://doi.org/10.1111/gcb.12502> PMID: 24443361
16. Field JC, Baltz KEN, Walker W. Range expansion and trophic interactions of the jumbo squid, *Dosidicus gigas*, in the California Current. *Calif Coop Ocean Fish Investig Reports*. 2007; 48: 131–146.
17. Zuyev G, Nigmatullin C, Chesalin M, Nesis K. Main results of long-term worldwide studies on tropical nektonic oceanic squid genus *Sthenoteuthis*: An overview of the Soviet investigations. *Bull Mar Sci*. 2002; 71: 1019–1060.
18. Arkhipkin A, Mikheev A. Age and growth of the squid *Sthenoteuthis pteropus* (Oegopsida: Ommastrephidae) from the Central-East Atlantic. *J Exp Mar Bio Ecol*. 1992; 163: 261–276. [https://doi.org/10.1016/0022-0981\(92\)90054-E](https://doi.org/10.1016/0022-0981(92)90054-E)
19. Zuev GV., Nikolsky VN. Ecological mechanisms related to intraspecific structure of the nektonic squid *Sthenoteuthis pteropus* (Steenstrup). *Recent Adv Fish Biol*. 1993; 653–664.
20. Ruiz-Cooley RI, Markaida U, Gendron D, Aguíñiga S. Stable isotopes in jumbo squid (*Dosidicus gigas*) beaks to estimate its trophic position: comparison between stomach contents and stable isotopes. *J Mar Biol Assoc UK*. 2006; 86: 437. <https://doi.org/10.1017/S0025315406013324>
21. Ruiz-Cooley RI, Villa EC, Gould WR. Ontogenetic variation of  $\delta^{13}\text{C}$  and  $\delta^{15}\text{N}$  recorded in the gladius of the jumbo squid *Dosidicus gigas*: Geographic differences. *Mar Ecol Prog Ser*. 2010; 399: 187–198. <https://doi.org/10.3354/meps08383>
22. Chérel Y, Fontaine C, Jackson GD, Jackson CH, Richard P. Tissue, ontogenic and sex-related differences in  $\delta^{13}\text{C}$  and  $\delta^{15}\text{N}$  values of the oceanic squid *Todarodes filippovae* (Cephalopoda: Ommastrephidae). *Mar Biol*. 2009; 699–708. <https://doi.org/10.1007/s00227-008-1121-x>
23. Lordan C, Burnell GM, Cross TF. The diet and ecological importance of *Illex coindetii* and *Todaropsis eblanae* (Cephalopoda: Ommastrephidae) in Irish waters. *South African J Mar Sci*. 1998; 20: 153–163. <https://doi.org/10.2989/025776198784126214>
24. Jackson GD, Bustamante P, Chérel Y, Fulton EA, Grist EPM, Jackson CH, et al. Applying new tools to cephalopod trophic dynamics and ecology: perspectives from the Southern Ocean Cephalopod Workshop, February 2–3, 2006. *Rev Fish Biol Fish*. 2007; 17: 79–99. <https://doi.org/10.1007/s11160-007-9055-9>
25. Kear AJ. The diet of Antarctic squid: comparison of conventional and serological gut content analyses. *J Exp Mar Biol Ecol*. 1992; 156: 161–178.
26. Deagle BE, Jarman SN, Pemberton D, Gales NJ. Genetic screening for prey in the gut contents from a giant squid (*Architeuthis* sp.). *J Hered*. 2005; 96: 417–423. <https://doi.org/10.1093/jhered/esi036> PMID: 15743905
27. Frézal L, Leblois R. Four years of DNA barcoding: Current advances and prospects. *Infect Genet Evol*. 2008; 8: 727–736. <https://doi.org/10.1016/j.meegid.2008.05.005> PMID: 18573351
28. Ruiz-Cooley RI, Ballance LT, McCarthy MD. Range expansion of the jumbo squid in the NE Pacific:  $\delta^{15}\text{N}$  decrypts multiple origins, migration and habitat use. *PLoS One*. Public Library of Science; 2013;8. <https://doi.org/10.1371/journal.pone.0059651> PMID: 23527242
29. Graham BS, Koch PL, Newsome SD, McMahon KW, Aurioles D. Using isoscapes to trace the movements and foraging behavior of top predators in oceanic ecosystems. *Isoscapes: Understanding movement, pattern, and process on Earth through isotope mapping*. Springer Science + Business Media B. V.; 2010. <https://doi.org/10.1007/978-90-481-3354-3>
30. Moltshaniwskij NA, Hall K, Lipinski MR, Marian JEAR, Nishiguchi M, Sakai, et al. Ethical and welfare considerations when using cephalopods as experimental animals. *Rev Fish Biol Fish*. 2007; 17: 455–476. <https://doi.org/10.1007/s11160-007-9056-8>
31. Lipiński MR, Underhill LG. Sexual maturation in squid: quantum or continuum? *South African J Mar Sci*. 1995; 15: 207–223. <https://doi.org/10.2989/02577619509504844>
32. Breiby A, Jobling M. Predatory role of the flying squid (*Todarodes sagittatus*) in North Norwegian Waters. *NAFO Sci Coun*. 1985; 9: 125–132.
33. Tuset VM, Lombarte A, Assis C. Otolith atlas for the western Mediterranean, north and central eastern Atlantic. *Sci Mar*. 2008; 72S1: 7–198.
34. Campana SE. *Photographic atlas of fish otoliths of the northwest Atlantic Ocean*. Ottawa, Ontario: NRC Research Press; 2004. <https://doi.org/10.1139/9780660191089>
35. Schwarzhans W. Otoliths from dredges in the Gulf of Guinea and off the Azores—an actuo-paleontological case study. *Paleo Ichthyol*. 2013; 13: 7–40.
36. Schwarzhans W. A comparative morphological study of the recent otoliths of the genera *Diaphus*, *Idiolychnus* and *Lobianchia* (Myctophidae). *Paleo Ichthyol*. 2013; 13: 41–82.

37. Schwarzhan W. Otoliths of the Myctophidae from the Neogene of tropical America. *Paleo Ichthyol.* 2013; 13: 83–150.
38. Clarke MR. The role of cephalopods in the world's Oceans: General conclusion and the future. *Philos Trans R Soc London Biol Sci.* 1996; 351: 1105–1112.
39. Maddison DR, Schulz K-S. The Tree of Life Web Project [Internet]. 2007. Available: <http://tolweb.org>
40. Vinogradov ME, Volkov A, Semenova TN. Hyperiid amphipods (Amphipoda, Hyperieida) of the world oceans. Lebanon, USA: Washington D.C.: Smithsonian Institution Libraries; 1996.
41. Marine Species Identification Portal [Internet]. 2017. Available: <http://species-identification.org/>
42. Cailliet GM. Several approaches to the feeding ecology of fishes. *Proc First Pacific Northwest Tech Work.* 1977; Washington: 1–13.
43. Bizikov VA. A new method of squid age determination using the gladius. Jereb P, Ragonese S Boletzky S V, eds *Squid age Determining using statoliths.* 1991; 39–51.
44. Perez JAA, O'Dor RK, Beck P, Dawe EG. Evaluation of gladius dorsal surface structure for age and growth studies of the short-finned squid, (*Illex illecebrosus*) (Teuthoidea: Ommastrephidae). *Can J Fish Aquat Sci.* 1996; 53: 2837–2846. <https://doi.org/10.1139/f96-228>
45. Lorrain A, Argüelles J, Alegre A, Bertrand A, Munaron JM, Richard P, et al. Sequential isotopic signature along gladius highlights contrasted individual foraging strategies of jumbo squid (*Dosidicus gigas*). *PLoS One.* 2011;6. <https://doi.org/10.1371/journal.pone.0022194> PMID: 21779391
46. Roper CFE, Nigmatullin C, Jereb P. Family Ommastrephidae. In Jereb P. & Roper C.F.E., eds. *Cephalopods of the world. An annotated and illustrated catalogue of species known to date. Volume 2. Myopsid and Oegopsid Squids.* FAO Species Catalogue for Fishery Purposes. No. 4, Rome, FAO. 2010. <https://doi.org/10.1017/CBO9781107415324.004>
47. Post DM, Layman CA, Arrington DA, Takimoto G, Quattrochi J, Montaña CG. Getting to the fat of the matter: Models, methods and assumptions for dealing with lipids in stable isotope analyses. *Oecologia.* 2007; 152: 179–189. <https://doi.org/10.1007/s00442-006-0630-x> PMID: 17225157
48. Folmer O, Black M, Hoeh W, Lutz R, Vrijenhoek R. DNA primers for amplification of mitochondrial cytochrome c oxidase subunit I from diverse metazoan invertebrates. *Mol Mar Biol Biotechnol.* 1994; 3: 294–299. <https://doi.org/10.1371/journal.pone.0013102> PMID: 7881515
49. Ivanova N V., Zemlak TS, Hanner RH, Hebert PDN. Universal primer cocktails for fish DNA barcoding. *Mol Ecol Notes.* 2007; 7: 544–548. <https://doi.org/10.1111/j.1471-8286.2007.01748.x>
50. Zuur AF, Ieno EN, Elphick CS. A protocol for data exploration to avoid common statistical problems. *Methods Ecol Evol.* 2010; 1: 3–14. <https://doi.org/10.1111/j.2041-210X.2009.00001.x>
51. Pinheiro J, Bates D, DebRoy S, Sarkar D, Team RC. nlme: Linear and nonlinear mixed effects models [Internet]. 2017. p. R package version 3.1–131. Available: <https://cran.r-project.org/package=nlme>
52. Wood SN. *Generalized additive models: An introduction with R.* Chapman and Hall/CRC; 2006.
53. Venables WN, Ripley BD. *Modern applied statistics with S.* Fourth. New York: Springer; 2002.
54. Minagawa M, Wada E. Stepwise enrichment of <sup>15</sup>N along food chains: Further evidence and the relation between δ<sup>15</sup>N and animal age. *Geochim Cosmochim Acta.* 1984; 48: 1135–1140. [https://doi.org/10.1016/0016-7037\(84\)90204-7](https://doi.org/10.1016/0016-7037(84)90204-7)
55. Hoving HJT, Robison BH. Deep-sea in situ observations of gonatid squid and their prey reveal high occurrence of cannibalism. *Deep Res Part I Oceanogr Res Pap.* 2016; 116: 94–98. <https://doi.org/10.1016/j.dsr.2016.08.001>
56. Markaida U, Sosa-Nishizaki O. Food and feeding habits of jumbo squid *Dosidicus gigas* (Cephalopoda: Ommastrephidae) from the Gulf of California, Mexico. *J Mar Biol Assoc United Kingdom.* 2003;83.
57. Piatkowski U, Hernandez-Garcia V, Clarke MR. On the biology of the european flying squid *Todarodes sagittatus* (Lamarck, 1798) (Cephalopoda, Ommastrephidae) in the central eastern Atlantic. *South African J Mar Sci.* 1998; 20: 375–383. <https://doi.org/10.2989/025776198784126232>
58. Watanabe H, Kawaguchi K, Hayashi A. Feeding habits of juvenile surface-migratory myctophid fishes (family Myctophidae) in the Kuroshio region of the western North Pacific. *Mar Ecol Prog Ser.* 2002; 236: 263–272. <https://doi.org/10.3354/meps236263>
59. Kinzer J, Schulz K. Vertical distribution and feeding patterns of midwater fish in the central equatorial Atlantic I. Myctophidae. *Mar Biol.* 1985; 85: 313–322.
60. Sassa C, Kawaguchi K. Larval feeding habits of *Diaphus garmani* and *Myctophum asperum* (Pisces: Myctophidae) in the transition region of the western North Pacific. *Mar Ecol Prog Ser.* 2004; 278: 279–290. <https://doi.org/10.3354/meps278279>
61. Shreeve R, Collins M, Tarling G, CE M, Ward P, Johnston N. Feeding ecology of myctophid fishes in the northern Scotia Sea. *Mar Ecol Prog Ser.* 2009; 386: 221–236.

62. Hopkins TL, Gartner J. Resource-partitioning and predation impact of a low-latitude myctophid community. *Mar Biol.* 1992; 114: 185–197. <https://doi.org/10.1007/BF00349518>
63. Fox LR. Cannibalism in natural populations. *Annu Rev Ecol Syst.* 1975; 6: 87–106. <https://doi.org/10.1146/annurev.es.06.110175.000511>
64. Ibáñez CM, Keyl F. Cannibalism in cephalopods. *Rev Fish Biol Fish.* 2010; 20: 123–136. <https://doi.org/10.1007/s11160-009-9129-y>
65. Gasca R, Haddock SHD. Associations between gelatinous zooplankton and hyperiid amphipods (Crustacea: Peracarida) in the Gulf of California. *Hydrobiologia.* 2004; 530–531: 529–535. <https://doi.org/10.1007/s10750-004-2657-5>
66. Madin LP, Harbison GR. The associations of Amphipoda Hyperiidea with gelatinous zooplankton. I. Associations with Salpidae. *Deep Res.* 1977;24. [https://doi.org/10.1016/0146-6291\(77\)90483-0](https://doi.org/10.1016/0146-6291(77)90483-0)
67. Gasca R, Browne WE. Symbiotic associations of crustaceans and a pycnogonid with gelatinous zooplankton in the Gulf of California. *Mar Biodivers.* 2017; <https://doi.org/10.1007/s12526-017-0668-5>
68. Arai MN. Predation on pelagic coelenterates: a review. *J Mar Biol Assoc UK.* 2005; 85: 523–536. <https://doi.org/10.1017/S0025315405011458>
69. Piontkovski S, Williams R, Ignatyev S, Boltachev A, Chesalin M. Structural–functional relationships in the pelagic community of the eastern tropical Atlantic Ocean. *J Plankton Res.* 2003; 25: 1021–1034.
70. Harbison GR, Biggs DC, Madin LP. The associations of Amphipoda Hyperiidea with gelatinous zooplankton-II. Associations with Cnidaria, Ctenophora and Radiolaria. *Deep Res.* 1977; 24: 465–472. [https://doi.org/10.1016/0146-6291\(77\)90484-2](https://doi.org/10.1016/0146-6291(77)90484-2)
71. Laval P. Hyperiid amphipods as crustacean parasitoids associated with gelatinous zooplankton. *Oceanogr Mar Biol Annu Rev.* 1980; 18: 11–56.
72. Lavaniegos BE, Ohman MD. Hyperiid amphipods as indicators of climate change in the California current. *Proceedings Fourth Int Crustac Congr.* 1999; 1: 489–509.
73. Kruse S, Pakhomov EA, Hunt BP V, Chikaraishi Y, Ogawa NO, Bathmann U. Uncovering the trophic relationship between *Themisto gaudichaudii* and *Salpa thompsoni* in the Antarctic Polar Frontal Zone. *Mar Ecol Prog Ser.* 2015; 529: 63–74. <https://doi.org/10.3354/meps11288>
74. Biggs D, Harbison G. The siphonophore *Bathypphysa sibogae* Lens and van Riemsdijk, 1908, in the Sargasso Sea, with notes on its natural history. *Bull Mar Sci.* 1976; 26: 14–18.
75. Burrige AK, Tump M, Vonk R, Goetze E, Peijnenburg KT. Diversity and distribution of hyperiid amphipods along a latitudinal transect in the Atlantic Ocean. *Prog Oceanogr.* 2016.
76. Macpherson E. Large-scale species-richness gradients in the Atlantic Ocean. *Proc Biol Sci.* 2002; 269: 1715–20. <https://doi.org/10.1098/rspb.2002.2091> PMID: [12204133](https://pubmed.ncbi.nlm.nih.gov/12204133/)
77. Choy A, Wabnitz C, Weijerman M, Woodworth-Jefcoats P, Polovina J. Finding the way to the top: how the composition of oceanic mid-trophic micronekton groups determines apex predator biomass in the central North Pacific. *Mar Ecol Prog Ser.* 2016; 549: 9–25. <https://doi.org/10.3354/meps11680>
78. Cardona L, de Quevedo IÁ, Borrell A, Aguilar A. Massive consumption of gelatinous plankton by Mediterranean apex predators. *PLoS One.* 2012;7. <https://doi.org/10.1371/journal.pone.0031329> PMID: [22470416](https://pubmed.ncbi.nlm.nih.gov/22470416/)
79. Bulman C, He X, Koslow J. Trophic ecology of the mid-slope demersal fish community off southern Tasmania, Australia. *Mar Freshw Res.* 2002; 53: 59–72.
80. Purcell JE. Interactions of pelagic cnidarians and ctenophores with fish: A review. *Hydrobiologia.* 2001; 451: 27–44.
81. Heeger T, Piatkowski U, Moller H. Predation on jellyfish by the cephalopod *Argonauta argo*. *Mar Ecol Prog Ser.* 1992; 88: 293–296. <https://doi.org/10.3354/meps088293>
82. Brodeur RD, Lorz H V, Percy WG. Food habits and dietary variability of pelagic nekton off Oregon, 1979–1984. NOAA Technical Report NMFS 57. 1987.
83. Brodeur RD and P WG. Effects of environmental variability on trophic interactions and food web structure in a pelagic upwelling ecosystem. *Mar Ecol Prog Ser.* 1992; 84: 101–119.
84. Hoving HJT, Haddock SHD. The giant deep-sea octopus *Haliphron atlanticus* forages on gelatinous fauna. *Nat Sci Reports.* 2017;7.
85. Voss M, Dippner JW, Montoya JP. Nitrogen isotope patterns in the oxygen-deficient waters of the eastern tropical North Pacific Ocean. *Deep Sea Res Part I Oceanogr Res Pap.* 2001; 48: 1905–1921. [https://doi.org/10.1016/S0967-0637\(00\)00110-2](https://doi.org/10.1016/S0967-0637(00)00110-2)
86. Sigman DM, Altabet MA, McCorkle DC, Francois R, Fischer G. The  $\delta^{15}\text{N}$  of nitrate in the southern ocean: Consumption of nitrate in surface waters. *Global Biogeochem Cycles.* 1999; 13: 1149–1166. <https://doi.org/10.1029/1999GB900038>

87. Ménard F, Lorrain A, Potier M, Marsac F. Isotopic evidence of distinct feeding ecologies and movement patterns in two migratory predators (yellowfin tuna and swordfish) of the western Indian Ocean. *Mar Biol.* 2007; 153: 141–152. <https://doi.org/10.1007/s00227-007-0789-7>
88. Lorrain A, Graham B, Ménard F, Popp B, Bouillon S, Van Breugel P, et al. Nitrogen and carbon isotope values of individual amino acids: A tool to study foraging ecology of penguins in the Southern Ocean. *Mar Ecol Prog Ser.* 2009; 391: 293–306. <https://doi.org/10.3354/meps08215>
89. Graham BS, Grubbs D, Holland K, Popp BN. A rapid ontogenetic shift in the diet of juvenile yellowfin tuna from Hawaii. *Mar Biol.* 2007; 150: 647–658. <https://doi.org/10.1007/s00227-006-0360-y>
90. Saino T, Hattori A.  $^{15}\text{N}$  natural abundance in oceanic suspended particulate matter. *Nature.* 1980; 283: 752–754.
91. Trull TW, Davies D, Casciotti K. Insights into nutrient assimilation and export in naturally iron-fertilized waters of the Southern Ocean from nitrogen, carbon and oxygen isotopes. *Deep Sea Res Part II Top Stud Oceanogr.* 2008; 55: 820–840. <http://dx.doi.org/10.1016/j.dsr2.2007.12.035>
92. Bolnick DI, Svanbäck R, Fordyce J a, Yang LH, Davis JM, Hulseley CD, et al. The ecology of individuals: incidence and implications of individual specialization. *Am Nat.* 2003; 161: 1–28. <https://doi.org/10.1086/343878> PMID: 12650459
93. Bearhop S, Adams CE, Waldron S, Fuller RA, Macleod H. Determining trophic niche width: a novel approach using stable isotope analysis. *J Anim Ecol.* 2004; 73: 1007–1012.
94. Li Y, Gong Y, Zhang Y, Chen X. Inter-annual variability in trophic patterns of jumbo squid (*Dosidicus gigas*) off the exclusive economic zone of Peru, implications from stable isotope values in gladius. *Fish Res.* 2017; 187: 22–30.
95. Partridge L, Green P. Intraspecific feeding specializations and population dynamics. *Behavioural ecology.* Sibly RM,. Oxford: Blackwell Scientific Publications; 1985. pp. 207–226.
96. Magurran AE. Individual differences in fish behavior. *The behavior of teleost fishes.* Pitcher TJ. London: Croon Helm Press; 1986. pp. 338–365.
97. Parry M. Trophic variation with length in two ommastrephid squids, *Ommastrephes bartramii* and *Sthenoteuthis oualaniensis*. *Mar Biol.* 2008; 153: 249–256. <https://doi.org/10.1007/s00227-007-0800-3>
